# Supplementary material for: Enrichment of Phosphorylated Tau (Thr181) and Functionally Interacting Molecules in Chronic Traumatic Encephalopathy Brain-derived Extracellular Vesicles
Source: PubMed Central journal article supplement (PMC8407888; doi:10.14336/ad.2020.1007), 2021-09-01
Supplement: AD-12-6-1376-s.pdf [file AD-12-6-1376-s.pdf]

## SUPPLEMENTARY DATA

# **Enrichment of Phosphorylated Tau (Thr181) and Functionally Interacting Molecules in Chronic Traumatic Encephalopathy Brain-derived Extracellular Vesicles**

**Satoshi Muraoka<sup>1</sup>, Weiwei Lin<sup>2,3</sup>, Kayo Takamatsu-Yukawa<sup>1</sup>, Jianqiao Hu<sup>1</sup>, Seiko Ikezu<sup>1</sup>, Michael A. DeTure<sup>4</sup>, Dennis W. Dickson<sup>4</sup>, Andrew Emili<sup>2,3</sup>, Tsuneya Ikezu<sup>1,5,6\*</sup>**

# SUPPLEMENTARY DATA

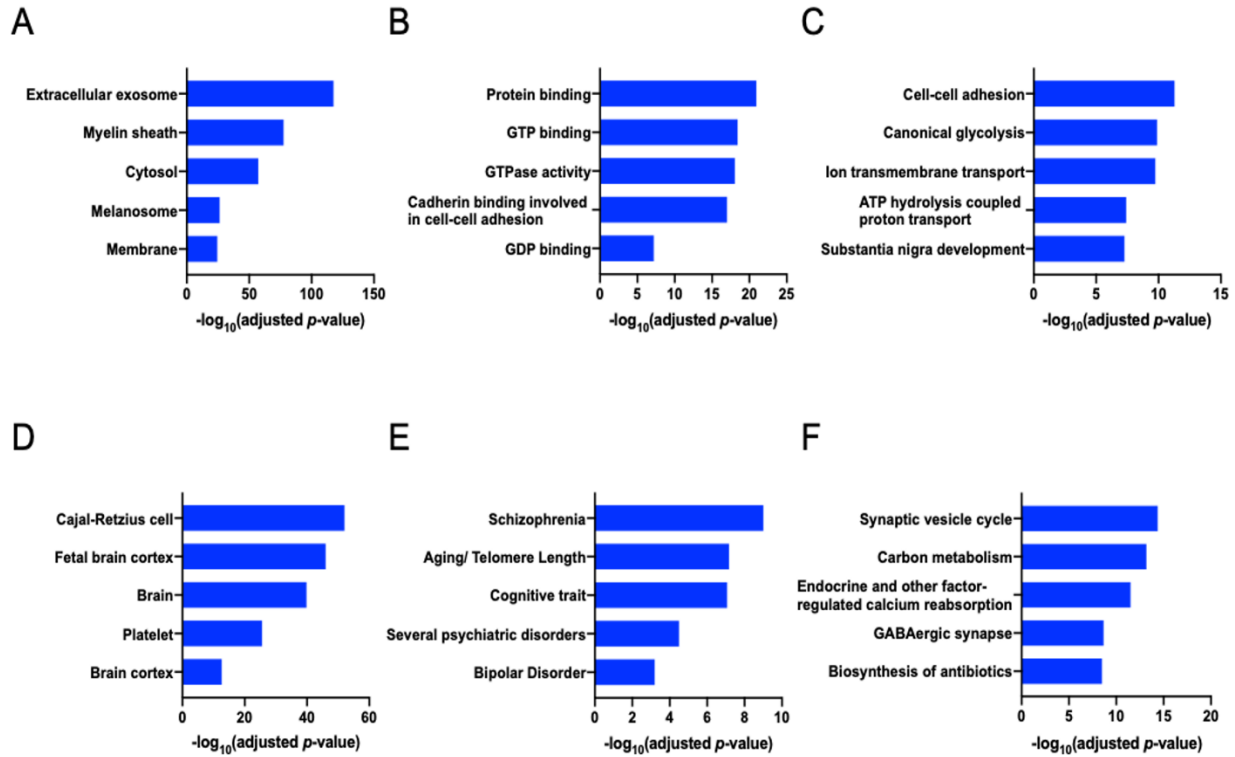

**Supplementary Figure 1. Gene Ontology (GO) analysis of CTE brain-derived EV proteins using DAVID Bioinformatics Resources 6.8.** The GO term of Top5 Cellular Component A), Molecular Function B), Biological process C), Tissue Expression Ontology D), Disease Ontology E), and KEGG Pathway F) with  $-\log_{10}(\text{FDR } p\text{-value})$ .

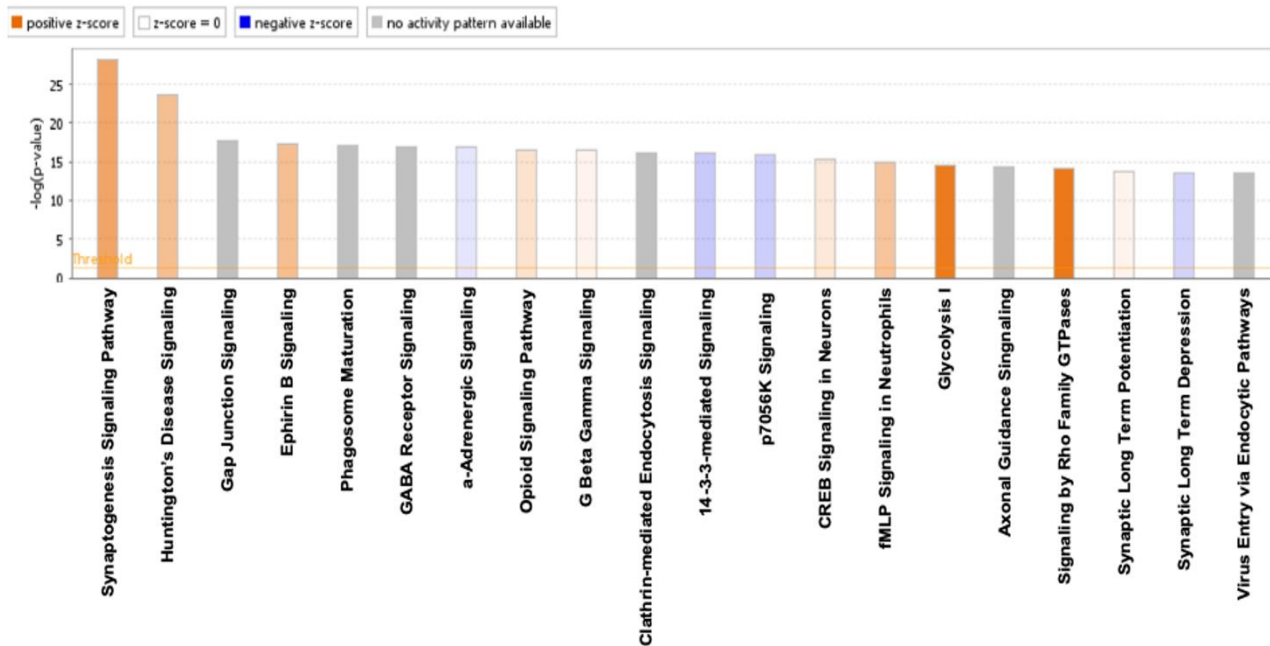

**Supplementary Figure 2. Networks generated by Ingenuity pathway analysis.** The canonical pathways that were up- and down-regulated in CTE compared to controls. Upregulated or down regulated pathway are denoted in red or blue.

# SUPPLEMENTARY DATA

**A**

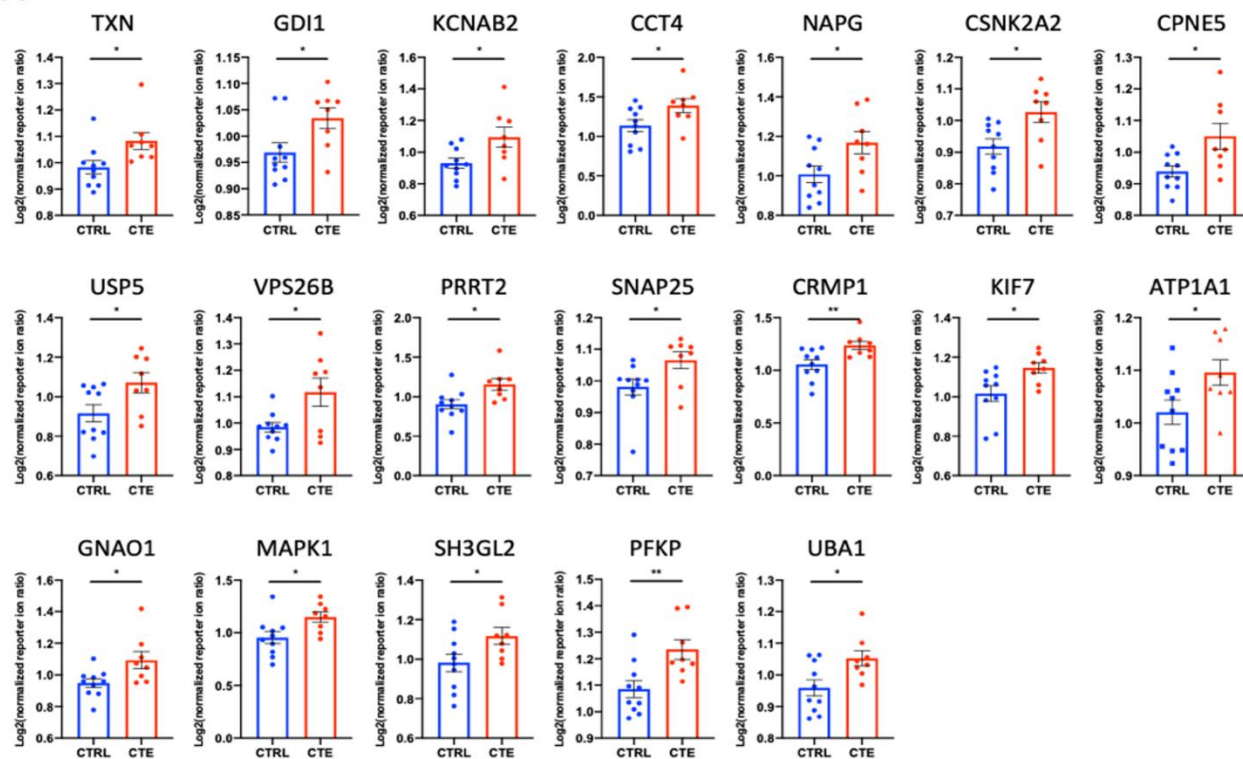

**B**

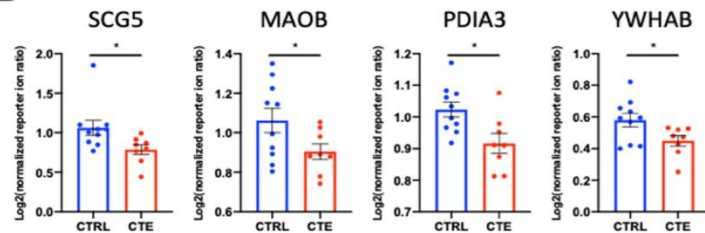

**Supplementary Figure 3. A box plot of TMT-reporter intensity normalized by pooled sample as a standard control. The t-test was calculated by Welch's test. A) The 19 proteins were up-regulated in CTE compared to CTRL groups. B) The four proteins were down-regulated in CTE compared to CTRL groups.**

## SUPPLEMENTARY DATA

A

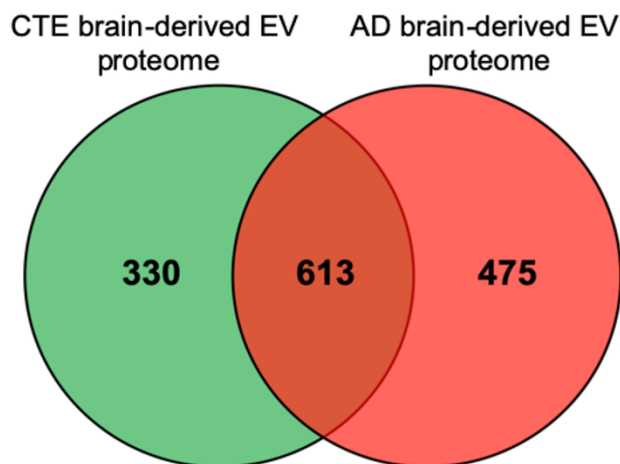

B

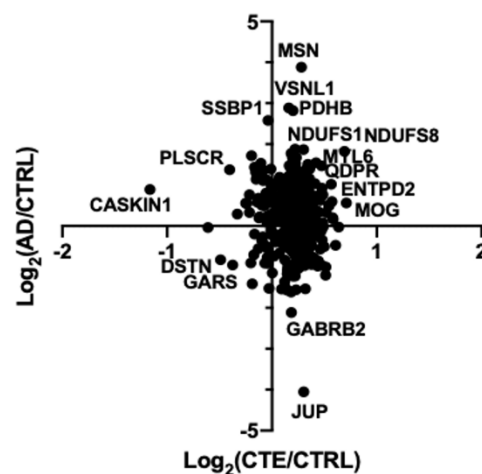

**Supplementary Figure 4. Comparison of CTE brain -derived EV proteome and AD brain - derived EV proteome.** A) The AD brain-derived EV proteome were identified 1080 proteins [1]. The 613 proteins were common between CTE brain -derived EV and AD brain -derived EV proteins. B) Scattered plot of CTE brain -derived EV and AD brain -derived EV proteins ( $r = -0.0514$ ,  $p = 0.2397$  using two -tailed t -test).

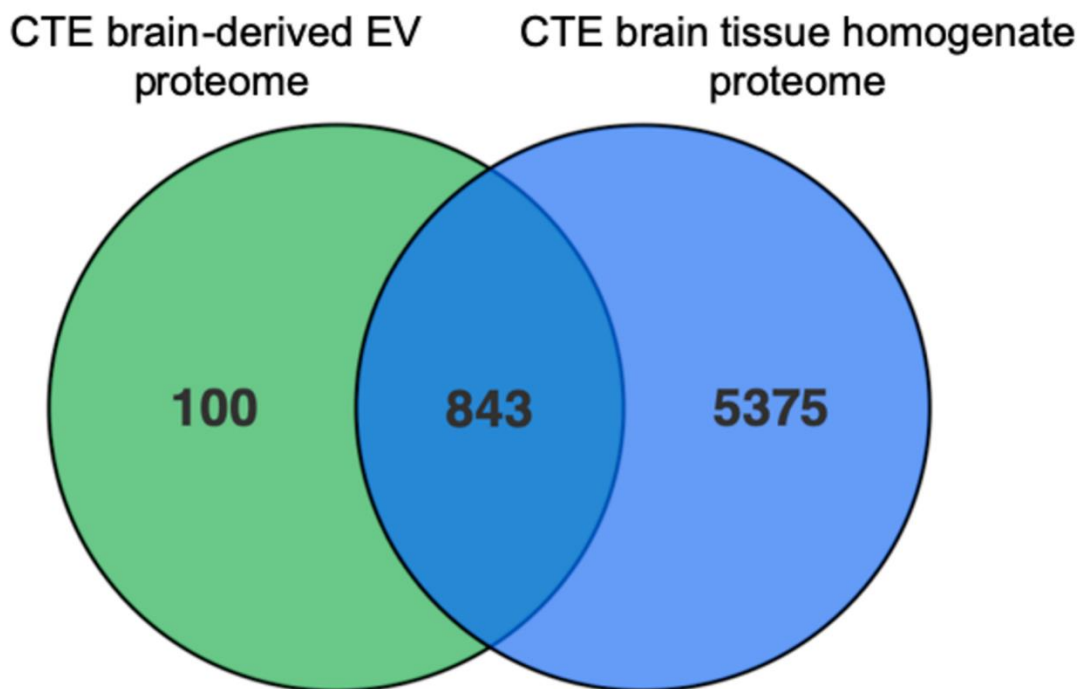

**Supplementary Figure 5. Comparison of CTE brain-derived EV proteome and CTE brain tissue homogenates proteome.** The CTE brain tissue homogenates proteomics data, which was published by Bi et al. was identified 6218 proteins [2]. The 843 proteins were common between CTE brain-derived EV and CTE brain tissue homogenate proteins.

# SUPPLEMENTARY DATA

**Supplementary Table 1.** Assessment of the degree of purity of EV preparation.

| Transmembrane or GPI anchored proteins associated to plasma membrane and endosomes |                |            |
|------------------------------------------------------------------------------------|----------------|------------|
| For all EVs                                                                        |                |            |
| Category                                                                           | Gene name      | Uniprot ID |
| 1a                                                                                 | GNAI2          | P04899     |
|                                                                                    | GNAO1          | P09471     |
|                                                                                    | GNAZ           | P19086     |
|                                                                                    | GNA11          | P29992     |
|                                                                                    | GNAQ           | P50148     |
|                                                                                    | GNAS           | P63092     |
|                                                                                    | GNAI1          | P63096     |
|                                                                                    | GNA13          | Q14344     |
|                                                                                    | HLA-B          | P01889     |
|                                                                                    | ITGAV          | P06756     |
|                                                                                    | ITGA6          | P23229     |
|                                                                                    | ITGB1          | P05556     |
|                                                                                    | EMMPRIN (BSG)  | P35613     |
|                                                                                    | ADAM10         | O14672     |
| CD73 (NT5E)                                                                        | P21589         |            |
| CD59                                                                               | P13987         |            |
| 1b                                                                                 | CD90 (THY1)    | P04216     |
|                                                                                    | APP            | P05067     |
| Cytosolic proteins recovered in EVs                                                |                |            |
| For all EVs                                                                        |                |            |
| 2a                                                                                 | ALIX (PDCD6IP) | Q8WUM4     |
|                                                                                    | FLOT1          | O75955     |
|                                                                                    | FLOT2          | Q14254     |
|                                                                                    | EHD1           | Q9H4M9     |
|                                                                                    | EHD3           | Q9NZN3     |
|                                                                                    | EHD2           | Q9NZN4     |
|                                                                                    | RHOA           | P61586     |
|                                                                                    | ANXA1          | P04083     |
|                                                                                    | ANXA2          | P07355     |
|                                                                                    | ANXA6          | P08133     |
| ANXA5                                                                              | P08758         |            |

# SUPPLEMENTARY DATA

|                                                                                                  |                 |        |
|--------------------------------------------------------------------------------------------------|-----------------|--------|
|                                                                                                  | ANXA7           | P20073 |
|                                                                                                  | ANXA11          | P50995 |
|                                                                                                  | HSPA8           | P11142 |
|                                                                                                  | HSP90AB1        | P08238 |
|                                                                                                  | SDCBP           | O00560 |
|                                                                                                  | Tau (MAPT)      | P10636 |
|                                                                                                  | ACTG1           | P63261 |
|                                                                                                  | TUBAL3          | A6NHL2 |
|                                                                                                  | TPPP            | O94811 |
|                                                                                                  | TUBB4A          | P04350 |
|                                                                                                  | TUBB            | P07437 |
| 2b                                                                                               | TUBA1A          | Q71U36 |
|                                                                                                  | TUBA4A          | P68366 |
|                                                                                                  | TUBB4B          | P68371 |
|                                                                                                  | TUBB3           | Q13509 |
|                                                                                                  | TUBB2B          | Q9BVA1 |
|                                                                                                  | TUBB8           | Q3ZCM7 |
|                                                                                                  | GAPDH           | P04406 |
| Major components of non-EV co-isolated structures                                                |                 |        |
| For non-EV (contaminant)                                                                         |                 |        |
| 3a                                                                                               | ALB             | P02768 |
| Analysis of protein of this category is required<br>when claiming specific analysis of small EVs |                 |        |
| Evs (large oncosomes, large EVs)                                                                 |                 |        |
| For small EVs                                                                                    |                 |        |
| 4a (nucleus)                                                                                     | HIST1H2BL       | Q99880 |
|                                                                                                  | HIST1H2AJ       | Q99878 |
|                                                                                                  | HIST1H4A        | P62805 |
| 4c (ER, Golgi)                                                                                   | Grp94 (HSP90B1) | P14625 |
|                                                                                                  | BIP (HSPA5)     | P11021 |
| 4d (autophagosome)                                                                               | ACTN1           | P12814 |
| Analysis of protein of this category is required<br>when claiming functional activities          |                 |        |
| functional activities                                                                            |                 |        |
| For functional component                                                                         |                 |        |
| 5b (adhesion)                                                                                    | MFG8            | Q08431 |

# SUPPLEMENTARY DATA

| Tetraspanin     | TSPAN7                | P41732 |
|-----------------|-----------------------|--------|
|                 | Rab4A                 | P20338 |
|                 | Rab4B                 | P61018 |
|                 | Rab5b                 | P61020 |
|                 | Rab5c                 | P51148 |
|                 | Rab11b                | Q15907 |
| ESCRT machinery | Rab7a                 | P51149 |
|                 | VPS28                 | Q9UK41 |
|                 | VPS36                 | Q86VN1 |
|                 | Snf7-2(CHMP4B,VPS32B) | Q9H444 |
|                 | Rab27b                | O00194 |
|                 | Rab35                 | Q15286 |
|                 | syntenin-1(SDCBP)     | O00560 |

**Supplementary Table 2.** Identification and quantification of EVs separated from CTE and controls brain tissue.

| Protein IDs | Gene names | Protein names                                         | Ave_CTRL    | Ave_CTE     | log <sub>2</sub> (CTE/CTR L FC) | p-value <sup>a</sup> |
|-------------|------------|-------------------------------------------------------|-------------|-------------|---------------------------------|----------------------|
| P10599      | TXN        | Thioredoxin                                           | 0.982612065 | 1.082613861 | 0.139824906                     | 0.03017023           |
| Q01813      | PFKP       | ATP-dependent 6-phosphofructokinase, platelet type    | 1.085606193 | 1.235035538 | 0.186051699                     | 0.00798276           |
| P05408      | SCG5       | Neuroendocrine protein 7B2                            | 1.062220295 | 0.785712598 | -0.435009401                    | 0.02676405           |
| P19784      | CSNK2A2    | Casein kinase II subunit alpha                        | 0.918166614 | 1.026720028 | 0.161214955                     | 0.0177589            |
| Q7Z6L0      | PRRT2      | Proline-rich transmembrane protein 2                  | 0.904892386 | 1.155341546 | 0.352501273                     | 0.01836626           |
| Q14194      | CRMP1      | Dihydropyrimidinase-related protein 1                 | 1.055683554 | 1.235843659 | 0.2273188                       | 0.00948977           |
| Q2M1P5      | KIF7       | Kinesin-like protein KIF7                             | 1.015761905 | 1.145433765 | 0.173331764                     | 0.0160733            |
| P30101      | PDIA3      | Protein disulfide-isomerase A3                        | 1.02330167  | 0.915955765 | -0.159881684                    | 0.0160897            |
| P28482      | MAPK1      | Mitogen-activated protein kinase 1                    | 0.954403551 | 1.147871841 | 0.26629026                      | 0.02040801           |
| P45974      | USP5       | Ubiquitin carboxyl-terminal hydrolase 5               | 0.916464824 | 1.071238358 | 0.225128112                     | 0.03529199           |
| P60880      | SNAP25     | Synaptosomal-associated protein 25                    | 0.981106094 | 1.065253762 | 0.118716088                     | 0.03648962           |
| P09471      | GNAO1      | Guanine nucleotide-binding protein G(o) subunit alpha | 0.948644336 | 1.09302717  | 0.204390062                     | 0.03885183           |
| Q13303      | KCNAB2     | Voltage-gated potassium channel subunit beta-2        | 0.930639255 | 1.094655054 | 0.234182375                     | 0.0408079            |
| Q9HCH3      | CPNE5      | Copine-5                                              | 0.939261395 | 1.050479096 | 0.161448835                     | 0.03133789           |
| P05023      | ATP1A1     | Sodium/potassium-transporting ATPase subunit alpha-1  | 1.020500163 | 1.095769097 | 0.10266741                      | 0.04086187           |
| P50991      | CCT4       | T-complex protein 1 subunit delta                     | 1.135414227 | 1.389039333 | 0.290868728                     | 0.04180259           |
| P22314      | UBA1       | Ubiquitin-like modifier-activating enzyme 1           | 0.959177128 | 1.052764798 | 0.134313993                     | 0.01668341           |
| P31946      | YWHAB      | 14-3-3 protein beta/alpha                             | 0.579359454 | 0.448843351 | -0.368246697                    | 0.02909462           |

# SUPPLEMENTARY DATA

|        |         |                                                                                 |             |             |              |            |
|--------|---------|---------------------------------------------------------------------------------|-------------|-------------|--------------|------------|
| Q99747 | NAPG    | Gamma-soluble NSF attachment protein                                            | 1.008103    | 1.16837079  | 0.212855146  | 0.03915817 |
| Q6PIU2 | NCEH1   | Neutral cholesterol ester hydrolase 1                                           | 1.272657073 | 1.649581262 | 0.374256124  | 0.06161237 |
| P09104 | ENO2    | Gamma-enolase                                                                   | 0.935193492 | 1.03838908  | 0.151010321  | 0.09073754 |
| Q99962 | SH3GL2  | Endophilin-A1                                                                   | 0.981358666 | 1.116447738 | 0.186063307  | 0.04359349 |
| Q09470 | KCNA1   | Potassium voltage-gated channel subfamily A member 1                            | 0.98083712  | 1.117297332 | 0.187927678  | 0.06794857 |
| P53396 | ACLY    | ATP-citrate synthase                                                            | 1.038903882 | 1.088062233 | 0.066698893  | 0.09044608 |
| Q96P70 | IPO9    | Importin-9                                                                      | 0.917206873 | 1.064370374 | 0.214681189  | 0.09865718 |
| P23229 | ITGA6   | Integrin alpha-6                                                                | 1.036748536 | 0.937558972 | -0.145084666 | 0.10187327 |
| Q9HCM2 | PLXNA4  | Plexin-A4                                                                       | 0.976464483 | 1.078772247 | 0.143750837  | 0.1171458  |
| P31150 | GDI1    | Rab GDP dissociation inhibitor alpha                                            | 0.968822602 | 1.034160218 | 0.094155285  | 0.02791495 |
| P27338 | MAOB    | Amine oxidase [flavin-containing] B                                             | 1.061473482 | 0.904472061 | -0.230920487 | 0.04984126 |
| Q13362 | PPP2R5C | Serine/threonine-protein phosphatase 2A 56 kDa regulatory subunit gamma isoform | 0.914288685 | 0.794451496 | -0.202690625 | 0.05915672 |
| Q9BSJ8 | ESYT1   | Extended synaptotagmin-1                                                        | 1.006426227 | 1.122747054 | 0.157791514  | 0.06115764 |
| O60716 | CTNND1  | Catenin delta-1                                                                 | 0.925113386 | 1.054007254 | 0.188182692  | 0.08825556 |
| P15880 | RPS2    | 40S ribosomal protein S2                                                        | 1.230793478 | 1.069881313 | -0.202137944 | 0.09545186 |
| Q9Y376 | CAB39   | Calcium-binding protein 39                                                      | 0.900883951 | 1.043823241 | 0.21246425   | 0.05279138 |
| P49368 | CCT3    | T-complex protein 1 subunit gamma                                               | 0.981916027 | 1.091733561 | 0.152949251  | 0.06273029 |
| P09417 | QDPR    | Dihydropteridine reductase                                                      | 1.023330283 | 1.248824199 | 0.287298544  | 0.07424693 |
| P16152 | CBR1    | Carbonyl reductase [NADPH] 1                                                    | 1.04346246  | 1.138211357 | 0.125389781  | 0.07705886 |
| P69905 | HBA1    | Hemoglobin subunit alpha                                                        | 1.041767463 | 0.85982004  | -0.276926642 | 0.08199897 |
| Q01518 | CAP1    | Adenylyl cyclase-associated protein 1                                           | 1.046756571 | 1.1705398   | 0.161248014  | 0.09537515 |
| O95248 | SBF1    | Myotubularin-related protein 5                                                  | 1.07777102  | 1.195061915 | 0.149034664  | 0.09680421 |
| P12277 | CKB     | Creatine kinase B-type                                                          | 0.946818517 | 1.006695022 | 0.088466859  | 0.11105851 |
| P30086 | PEBP1   | Phosphatidylethanolamine-binding protein 1                                      | 1.032470494 | 1.130739277 | 0.131165762  | 0.11139839 |
| P28907 | CD38    | ADP-ribosyl cyclase/cyclic ADP-ribose hydrolase 1                               | 1.075662815 | 1.213208895 | 0.17360207   | 0.11399442 |
| P61266 | STX1B   | Syntaxin-1B                                                                     | 1.005389032 | 1.080905445 | 0.10448647   | 0.13824936 |
| P63027 | VAMP2   | Vesicle-associated membrane protein 2                                           | 0.973884224 | 1.048020207 | 0.105844355  | 0.24635526 |
| Q4G0F5 | VPS26B  | Vacuolar protein sorting-associated protein 26B                                 | 0.984501705 | 1.117332971 | 0.18259357   | 0.04534982 |
| Q9BWD1 | ACAT2   | Acetyl-CoA acetyltransferase, cytosolic                                         | 0.817494164 | 1.001671045 | 0.293128459  | 0.10507972 |
| Q96BM9 | ARL8A   | ADP-ribosylation factor-like protein 8A                                         | 1.087184702 | 1.02393186  | -0.086477349 | 0.30395439 |
| O75340 | PDCD6   | Programmed cell death protein 6                                                 | 0.920825818 | 0.876526817 | -0.071130053 | 0.35708879 |
| Q16555 | DPYSL2  | Dihydropyrimidinase-related protein 2                                           | 0.910871991 | 0.991544663 | 0.122429439  | 0.36340199 |
| P02794 | FTH1    | Ferritin heavy chain                                                            | 0.448145549 | 0.3317706   | -0.433781321 | 0.17193684 |
| P10636 | MAPT    | Microtubule-associated protein tau                                              | 1.003851757 | 1.325968691 | 0.401500474  | 0.0683613  |
| Q14515 | SPARCL1 | SPARC-like protein 1                                                            | 0.980948044 | 0.839278509 | -0.225027088 | 0.08457788 |
| P06744 | GPI     | Glucose-6-phosphate isomerase                                                   | 1.056095152 | 1.123245997 | 0.088934096  | 0.1103881  |
| Q05193 | DNM1    | Dynamin-1                                                                       | 1.017043852 | 1.098685602 | 0.11139672   | 0.1112133  |
| Q92598 | HSPH1   | Heat shock protein 105 kDa                                                      | 1.015918343 | 1.145246733 | 0.172874001  | 0.1132252  |
| O75110 | ATP9A   | Probable phospholipid-transporting ATPase IIA                                   | 0.956898483 | 0.824094438 | -0.215556204 | 0.11877693 |



# SUPPLEMENTARY DATA

|        |         |                                                                      |             |             |              |            |
|--------|---------|----------------------------------------------------------------------|-------------|-------------|--------------|------------|
| Q9Y2A7 | NCKAP1  | Nck-associated protein 1                                             | 0.938191141 | 1.01936322  | 0.119714422  | 0.12283608 |
| Q86UW7 | CADPS2  | Calcium-dependent secretion activator 2                              | 1.006201695 | 0.822699046 | -0.290482848 | 0.17111361 |
| P50914 | RPL14   | 60S ribosomal protein L14                                            | 1.051315187 | 0.978907919 | -0.102950193 | 0.18509263 |
| Q13618 | CUL3    | Cullin-3                                                             | 1.059081126 | 1.257564527 | 0.247819324  | 0.22308207 |
| Q14203 | DCTN1   | Dynactin subunit 1                                                   | 0.90548381  | 0.985034281 | 0.121485087  | 0.33072903 |
| Q9P0J0 | NDUFA13 | NADH dehydrogenase [ubiquinone] 1<br>alpha subcomplex subunit 13     | 1.138406559 | 1.329197273 | 0.223539358  | 0.3615545  |
| O43169 | CYB5B   | Cytochrome b5 type B                                                 | 2.13416317  | 2.240950555 | 0.070440334  | 0.92542323 |
| P17252 | PRKCA   | Protein kinase C alpha type                                          | 0.970330001 | 0.882697256 | -0.136556766 | 0.08525173 |
| A1L0T0 | ILVBL   | Acetolactate synthase-like protein                                   | 1.21368749  | 1.049905189 | -0.20913794  | 0.09212492 |
| P26232 | CTNNA2  | Catenin alpha-2                                                      | 0.940720149 | 0.994102477 | 0.079628974  | 0.09730129 |
| Q9Y2Q0 | ATP8A1  | Phospholipid-transporting ATPase 1A                                  | 0.937532877 | 0.810189511 | -0.210609874 | 0.14243824 |
| O75781 | PALM    | Paralemmin-1                                                         | 0.967723659 | 1.076066824 | 0.153100634  | 0.14884672 |
| P14174 | MIF     | Macrophage migration inhibitory factor                               | 1.043939213 | 1.117030354 | 0.097630682  | 0.22649306 |
| P84085 | ARF5    | ADP-ribosylation factor 5                                            | 0.906290002 | 0.846937186 | -0.097717795 | 0.23177794 |
| Q9NS86 | LANCL2  | LanC-like protein 2                                                  | 1.148146464 | 1.020797272 | -0.169610313 | 0.25241429 |
| Q9NP79 | VTA1    | Vacuolar protein sorting-associated<br>protein VTA1 homolog          | 0.951069703 | 0.879259951 | -0.113261322 | 0.27366587 |
| P08237 | PFKM    | ATP-dependent 6-phosphofructokinase,<br>muscle type                  | 1.017346303 | 1.052810635 | 0.049435113  | 0.34447106 |
| Q13424 | SNTA1   | Alpha-1-syntrophin                                                   | 1.02142877  | 0.978266167 | -0.062289648 | 0.58667377 |
| Q86Y82 | STX12   | Syntaxin-12                                                          | 1.107764005 | 1.016167589 | -0.124512211 | 0.06938293 |
| Q9Y4I1 | MYO5A   | Unconventional myosin-Va                                             | 0.95545354  | 1.042540638 | 0.125845994  | 0.07436188 |
| P48147 | PREP    | Prolyl endopeptidase                                                 | 0.903409501 | 1.008231481 | 0.158374914  | 0.08746098 |
| P04271 | S100B   | Protein S100-B                                                       | 0.776861888 | 0.70328252  | -0.143553777 | 0.1033322  |
| P49720 | PSMB3   | Proteasome subunit beta type-3                                       | 0.906371267 | 1.024075256 | 0.176147707  | 0.1057368  |
| P17600 | SYN1    | Synapsin-1                                                           | 0.967258858 | 1.044953413 | 0.111464684  | 0.11402851 |
| Q99798 | ACO2    | Aconitate hydratase, mitochondrial                                   | 1.025601632 | 0.960350762 | -0.09483712  | 0.14427487 |
| O43175 | PHGDH   | D-3-phosphoglycerate dehydrogenase                                   | 0.968996428 | 1.158746398 | 0.258001602  | 0.16430484 |
| P40925 | MDH1    | Malate dehydrogenase, cytoplasmic                                    | 0.942095378 | 1.025272155 | 0.122061889  | 0.16507586 |
| P63261 | ACTG1   | Actin                                                                | 0.943728435 | 1.007367774 | 0.094146806  | 0.18596046 |
| O00410 | IPO5    | Importin-5                                                           | 1.024037665 | 1.123391911 | 0.133592541  | 0.21056338 |
| Q8NEV1 | CSNK2A3 | Casein kinase II subunit alpha 3                                     | 0.869727732 | 0.922852806 | 0.085536722  | 0.21904509 |
| P55786 | NPEPPS  | Puromycin-sensitive aminopeptidase                                   | 0.9585094   | 1.030714727 | 0.104780606  | 0.25276125 |
| Q9UQM7 | CAMK2A  | Calcium/calmodulin-dependent protein<br>kinase type II subunit alpha | 0.970873153 | 1.023301551 | 0.075876626  | 0.26358508 |
| Q9NZN3 | EHD3    | EH domain-containing protein 3                                       | 0.962597273 | 1.005565898 | 0.063003388  | 0.27032001 |
| O75915 | ARL6IP5 | PRA1 family protein 3                                                | 0.976972165 | 0.925079202 | -0.078740568 | 0.27045455 |
| P07195 | LDHB    | L-lactate dehydrogenase B chain                                      | 1.065088813 | 1.199987405 | 0.172045527  | 0.36049196 |
| P63000 | RAC1    | Ras-related C3 botulinum toxin substrate 1                           | 1.068980274 | 1.201492084 | 0.168591912  | 0.39519438 |
| P05026 | ATP1B1  | Sodium/potassium-transporting ATPase<br>subunit beta-1               | 0.988942486 | 0.894079416 | -0.145483638 | 0.44743964 |
| P09382 | LGALS1  | Galectin-1                                                           | 1.063676163 | 1.004136494 | -0.083103598 | 0.54447377 |
| O00483 | NDUFA4  | Cytochrome c oxidase subunit NDUFA4                                  | 1.009674672 | 0.963974296 | -0.066823932 | 0.69538087 |

# SUPPLEMENTARY DATA

|        |          |                                                                   |             |             |              |            |
|--------|----------|-------------------------------------------------------------------|-------------|-------------|--------------|------------|
| O60268 | KIAA0513 | Uncharacterized protein KIAA0513                                  | 1.10507927  | 1.212320134 | 0.133620856  | 0.1015544  |
| Q7Z3U7 | MON2     | Protein MON2 homolog                                              | 1.009095705 | 0.864483976 | -0.223151882 | 0.12748011 |
| Q15041 | ARL6IP1  | ADP-ribosylation factor-like protein 6-interacting protein 1      | 1.045849723 | 0.878842092 | -0.250999693 | 0.13160171 |
| P00533 | EGFR     | Epidermal growth factor receptor                                  | 1.008166123 | 1.136940565 | 0.173423456  | 0.13194395 |
| Q9UBQ0 | VPS29    | Vacuolar protein sorting-associated protein 29                    | 1.132090478 | 1.366122069 | 0.271097136  | 0.15286866 |
| A6NHL2 | TUBAL3   | Tubulin alpha chain-like 3                                        | 1.06315508  | 1.236560056 | 0.217980253  | 0.16816353 |
| Q96GG9 | DCUN1D1  | DCN1-like protein 1                                               | 1.052848964 | 0.936667531 | -0.168689529 | 0.18367177 |
| P04264 | KRT1     | Keratin, type II cytoskeletal 1                                   | 0.967086869 | 1.020377245 | 0.077385241  | 0.18741636 |
| O43301 | HSPA12A  | Heat shock 70 kDa protein 12A                                     | 0.978804694 | 1.012403705 | 0.048691767  | 0.20479927 |
| P60842 | EIF4A1   | Eukaryotic initiation factor 4A-I                                 | 0.920698886 | 0.952478126 | 0.048956559  | 0.20801122 |
| Q9NZ32 | ACTR10   | Actin-related protein 10                                          | 1.010337044 | 0.92318905  | -0.130138633 | 0.23345782 |
| Q9ULP9 | TBC1D24  | TBC1 domain family member 24                                      | 0.945830879 | 1.050897624 | 0.151967984  | 0.2433588  |
| P21283 | ATP6V1C1 | V-type proton ATPase subunit C 1                                  | 1.08091819  | 0.934221355 | -0.210421008 | 0.24516676 |
| P04350 | TUBB4A   | Tubulin beta-4A chain                                             | 0.950169562 | 1.003394736 | 0.078632377  | 0.27197948 |
| Q96CS3 | FAF2     | FAS-associated factor 2                                           | 1.102912551 | 1.179494886 | 0.096850758  | 0.27388793 |
| P29401 | TKT      | Transketolase                                                     | 0.96871469  | 1.026358369 | 0.083390834  | 0.28544996 |
| Q15102 | PAFAH1B3 | Platelet-activating factor acetylhydrolase IB subunit gamma       | 1.06372751  | 1.139071634 | 0.098729847  | 0.29555027 |
| Q96JE9 | MAP6     | Microtubule-associated protein 6                                  | 1.039625288 | 1.130291427 | 0.120631164  | 0.31691167 |
| P61604 | HSPE1    | 10 kDa heat shock protein, mitochondrial                          | 1.088189971 | 0.949779795 | -0.196265467 | 0.32533134 |
| Q9BY11 | PACSIN1  | Protein kinase C and casein kinase substrate in neurons protein 1 | 1.008453522 | 1.054356561 | 0.064218245  | 0.36144783 |
| Q14254 | FLOT2    | Flotillin-2                                                       | 0.886905268 | 0.948704749 | 0.097179154  | 0.3659768  |
| P23634 | ATP2B4   | Plasma membrane calcium-transporting ATPase 4                     | 1.056499538 | 1.118106339 | 0.081765267  | 0.37063832 |
| P49327 | FASN     | Fatty acid synthase                                               | 1.038849577 | 1.134146444 | 0.126620167  | 0.43807416 |
| O14807 | MRAS     | Ras-related protein M-Ras                                         | 0.960028369 | 1.031829452 | 0.104055588  | 0.55636199 |
| O43426 | SYNJ1    | Synaptojanin-1                                                    | 1.078981344 | 0.956499666 | -0.173833551 | 0.14135747 |
| Q9GZN7 | ROGDI    | Protein rogd homolog                                              | 0.899988277 | 0.990762871 | 0.138633595  | 0.14620629 |
| P22695 | UQCRC2   | Cytochrome b-c1 complex subunit 2, mitochondrial                  | 1.083186817 | 1.008079788 | -0.103672255 | 0.21223858 |
| Q13363 | CTBP1    | C-terminal-binding protein 1                                      | 0.949848538 | 0.880587258 | -0.109231511 | 0.22483683 |
| P00568 | AK1      | Adenylate kinase isoenzyme 1                                      | 1.031381874 | 0.967212395 | -0.092673959 | 0.2258126  |
| Q02818 | NUCB1    | Nucleobindin-1                                                    | 0.921189388 | 0.847688911 | -0.119962877 | 0.24823236 |
| P78352 | DLG4     | Disks large homolog 4                                             | 0.960874935 | 1.197681478 | 0.317823706  | 0.26082387 |
| P19367 | HK1      | Hexokinase-1                                                      | 1.082296633 | 1.008887352 | -0.101330865 | 0.26160237 |
| P07437 | TUBB     | Tubulin beta chain                                                | 0.90085857  | 0.947258656 | 0.07245779   | 0.26635224 |
| Q92597 | NDRG1    | Protein NDRG1                                                     | 1.055256387 | 1.185801198 | 0.168268598  | 0.26654388 |
| P60891 | PRPS1    | Ribose-phosphate pyrophosphokinase 1                              | 0.942363461 | 0.987890988 | 0.068068251  | 0.28672437 |
| Q04837 | SSBP1    | Single-stranded DNA-binding protein, mitochondrial                | 1.179058055 | 0.98540511  | -0.258845898 | 0.29628889 |
| P61421 | ATP6V0D1 | V-type proton ATPase subunit d 1                                  | 1.049594628 | 0.984507748 | -0.092357776 | 0.32718953 |
| O75390 | CS       | Citrate synthase, mitochondrial                                   | 1.015032267 | 0.91614844  | -0.147872313 | 0.34083914 |
| P50148 | GNAQ     | Guanine nucleotide-binding protein G(q) subunit alpha             | 0.994836159 | 0.97272151  | -0.032432125 | 0.35508835 |

# SUPPLEMENTARY DATA

|        |               |                                                                                   |             |             |              |            |
|--------|---------------|-----------------------------------------------------------------------------------|-------------|-------------|--------------|------------|
| Q9UBB6 | NCDN          | Neurochondrin                                                                     | 0.948435753 | 1.016773156 | 0.100375892  | 0.36138462 |
| O00154 | ACOT7         | Cytosolic acyl coenzyme A thioester hydrolase                                     | 0.981876342 | 0.925802849 | -0.084836339 | 0.37512237 |
| P11021 | HSPA5         | 78 kDa glucose-regulated protein                                                  | 1.096986762 | 1.06084861  | -0.048327326 | 0.55224751 |
| Q9Y2S2 | CRYL1         | Lambda-crystallin homolog                                                         | 0.871894902 | 0.84517934  | -0.044896742 | 0.56567216 |
| P16298 | PPP3CB        | Serine/threonine-protein phosphatase 2B catalytic subunit beta isoform            | 0.896143137 | 0.905545698 | 0.015058262  | 0.83186589 |
| P42262 | GRIA2         | Glutamate receptor 2                                                              | 1.068507713 | 0.979317936 | -0.125748109 | 0.10380652 |
| P55290 | CDH13         | Cadherin-13                                                                       | 0.979055581 | 1.0457596   | 0.095088572  | 0.19380398 |
| Q93009 | USP7          | Ubiquitin carboxyl-terminal hydrolase 7                                           | 0.938792714 | 1.017633164 | 0.116339042  | 0.19962389 |
| P18124 | RPL7          | 60S ribosomal protein L7                                                          | 1.07982596  | 0.955350961 | -0.176696078 | 0.21645615 |
| P08133 | ANXA6         | Annexin A6                                                                        | 0.951975329 | 0.981310443 | 0.043785427  | 0.22873287 |
| Q13098 | GPS1          | COP9 signalosome complex subunit 1                                                | 0.906389945 | 1.005002857 | 0.14899584   | 0.23447074 |
| O00764 | PDXK          | Pyridoxal kinase                                                                  | 0.955383757 | 1.013953065 | 0.085838619  | 0.29753879 |
| P55072 | VCP           | Transitional endoplasmic reticulum ATPase                                         | 1.098564768 | 1.171998003 | 0.093350183  | 0.31002739 |
| Q99584 | S100A13       | Protein S100-A13                                                                  | 0.6458724   | 0.889164724 | 0.461201543  | 0.31135091 |
| A6NDG6 | PGP           | Phosphoglycolate phosphatase                                                      | 1.016118748 | 1.1120328   | 0.130130331  | 0.32755855 |
| P20338 | RAB4A         | Ras-related protein Rab-4A                                                        | 0.992020117 | 1.060604767 | 0.096445857  | 0.36090006 |
| Q15165 | PON2          | Serum paraoxonase/arylesterase 2                                                  | 1.072468489 | 0.963133226 | -0.155127982 | 0.37563003 |
| P22626 | HNRNPA2<br>B1 | Heterogeneous nuclear ribonucleoproteins A2/B1                                    | 0.842950473 | 0.779692451 | -0.112542703 | 0.40574879 |
| Q15904 | ATP6AP1       | V-type proton ATPase subunit S1                                                   | 1.091338869 | 1.159369265 | 0.087241006  | 0.42581912 |
| P61019 | RAB2A         | Ras-related protein Rab-2A                                                        | 0.924466387 | 0.903074759 | -0.033775443 | 0.45156001 |
| P14625 | HSP90B1       | Endoplasmic                                                                       | 1.062987138 | 1.009284283 | -0.074791547 | 0.56646411 |
| Q9NYB9 | ABI2          | Abl interactor 2                                                                  | 1.064803692 | 1.099340266 | 0.046050517  | 0.61665665 |
| Q9H4M9 | EHD1          | EH domain-containing protein 1                                                    | 1.049537017 | 1.066177476 | 0.022694558  | 0.69795044 |
| Q16658 | FSCN1         | Fascin                                                                            | 0.989422084 | 0.994229614 | 0.006992975  | 0.92017209 |
| P01112 | HRAS          | GTPase HRas                                                                       | 0.980252166 | 0.977013524 | -0.004774392 | 0.96682219 |
| P62873 | GNB1          | Guanine nucleotide-binding protein G(I)/G(S)/G(T) subunit beta-1                  | 0.934628809 | 0.935621051 | 0.001530814  | 0.97637669 |
| Q15907 | RAB11B        | Ras-related protein Rab-11B                                                       | 1.009831985 | 1.109818334 | 0.136208263  | 0.20605488 |
| Q9Y639 | NPTN          | Neuroplastin                                                                      | 1.001427737 | 0.924064046 | -0.115993568 | 0.2376465  |
| Q9UI12 | ATP6V1H       | V-type proton ATPase subunit H                                                    | 1.000446187 | 1.065618943 | 0.091048066  | 0.2416132  |
| P13987 | CD59          | CD59 glycoprotein                                                                 | 1.164275237 | 1.032499586 | -0.17329095  | 0.27252929 |
| Q02252 | ALDH6A1       | Methylmalonate-semialdehyde dehydrogenase [acylating], mitochondrial              | 0.949408806 | 1.060673489 | 0.159879279  | 0.27711895 |
| Q969P0 | IGSF8         | Immunoglobulin superfamily member 8                                               | 1.035068381 | 1.081369999 | 0.063134156  | 0.31465542 |
| Q92777 | SYN2          | Synapsin-2                                                                        | 1.058763213 | 1.141862204 | 0.109008588  | 0.32325125 |
| Q68D91 | MBLAC2        | Metallo-beta-lactamase domain-containing protein 2                                | 1.004608816 | 1.067225096 | 0.087230656  | 0.34033534 |
| Q9UMF0 | ICAM5         | Intercellular adhesion molecule 5                                                 | 1.039406458 | 0.980400148 | -0.084317321 | 0.37079596 |
| Q14974 | KPNB1         | Importin subunit beta-1                                                           | 1.132658096 | 1.231479951 | 0.120680706  | 0.37812073 |
| Q96QK1 | VPS35         | Vacuolar protein sorting-associated protein 35                                    | 1.004274614 | 1.060373721 | 0.078419001  | 0.41237356 |
| P30153 | PPP2R1A       | Serine/threonine-protein phosphatase 2A 65 kDa regulatory subunit A alpha isoform | 1.004270969 | 1.047282576 | 0.060502175  | 0.43583035 |
| O43681 | ASNA1         | ATPase ASNA1                                                                      | 0.967661888 | 0.99859535  | 0.045397147  | 0.45223168 |

# SUPPLEMENTARY DATA

|        |          |                                                                      |             |             |              |            |
|--------|----------|----------------------------------------------------------------------|-------------|-------------|--------------|------------|
| P36543 | ATP6V1E1 | V-type proton ATPase subunit E 1                                     | 0.979193465 | 1.044856878 | 0.093639504  | 0.45905423 |
| P06307 | CCK      | Cholecystokinin                                                      | 0.945642365 | 1.002434054 | 0.084140756  | 0.47454806 |
| Q00169 | PITPNA   | Phosphatidylinositol transfer protein alpha isoform                  | 0.961544989 | 0.906658997 | -0.084794319 | 0.49040622 |
| P00338 | LDHA     | L-lactate dehydrogenase A chain                                      | 1.002538966 | 1.057139753 | 0.076507801  | 0.50792775 |
| O15145 | ARPC3    | Actin-related protein 2/3 complex subunit 3                          | 0.904668054 | 0.93537508  | 0.048156465  | 0.65199394 |
| P14867 | GABRA1   | Gamma-aminobutyric acid receptor subunit alpha-1                     | 1.075324764 | 1.104784871 | 0.038993027  | 0.6706987  |
| P02511 | CRYAB    | Alpha-crystallin B chain                                             | 0.992763569 | 0.981354651 | -0.016675569 | 0.74562418 |
| P40926 | MDH2     | Malate dehydrogenase, mitochondrial                                  | 1.125728337 | 1.15043926  | 0.031326099  | 0.91394278 |
| Q9UI15 | TAGLN3   | Transgelin-3                                                         | 0.989068773 | 1.092579991 | 0.143596164  | 0.24885081 |
| O75306 | NDUFS2   | NADH dehydrogenase [ubiquinone] iron-sulfur protein 2, mitochondrial | 1.009081191 | 0.873070612 | -0.208872014 | 0.27176613 |
| O94973 | AP2A2    | AP-2 complex subunit alpha-2                                         | 0.97885472  | 1.04475526  | 0.093998364  | 0.31642722 |
| P09936 | UCHL1    | Ubiquitin carboxyl-terminal hydrolase isozyme L1                     | 1.021488333 | 1.098110274 | 0.104350213  | 0.33481606 |
| Q99726 | SLC30A3  | Zinc transporter 3                                                   | 1.093242001 | 0.980676695 | -0.156763294 | 0.36369731 |
| Q00610 | CLTC     | Clathrin heavy chain 1                                               | 0.940812436 | 0.973041608 | 0.048594367  | 0.38505677 |
| P25705 | ATP5A1   | ATP synthase subunit alpha, mitochondrial                            | 0.937375411 | 0.889773907 | -0.075188159 | 0.39437362 |
| P28331 | NDUFS1   | NADH-ubiquinone oxidoreductase 75 kDa subunit, mitochondrial         | 1.038732187 | 1.109448311 | 0.095018718  | 0.40660574 |
| P30626 | SRI      | Sorcin                                                               | 1.150601438 | 1.253449238 | 0.123515394  | 0.41898102 |
| P11234 | RALB     | Ras-related protein Ral-B                                            | 0.915068856 | 0.843421702 | -0.117626162 | 0.42193721 |
| P62879 | GNB2     | Guanine nucleotide-binding protein G(I)/G(S)/G(T) subunit beta-2     | 0.983512541 | 1.013009919 | 0.042632946  | 0.42994396 |
| P18669 | PGAM1    | Phosphoglycerate mutase 1                                            | 0.823186131 | 0.741772538 | -0.150241819 | 0.44530493 |
| Q9H4G0 | EPB41L1  | Band 4.1-like protein 1                                              | 1.090572983 | 1.13168407  | 0.053384939  | 0.5269328  |
| P54920 | NAPA     | Alpha-soluble NSF attachment protein                                 | 0.98052614  | 0.935752876 | -0.067428515 | 0.56524083 |
| Q8IV08 | PLD3     | Phospholipase D3                                                     | 1.090965671 | 1.073146052 | -0.02375927  | 0.6862825  |
| Q14195 | DPYSL3   | Dihydropyrimidinase-related protein 3                                | 1.165931701 | 1.191346192 | 0.031109426  | 0.82900167 |
| Q16775 | HAGH     | Hydroxyacylglutathione hydrolase, mitochondrial                      | 0.934533968 | 1.099600061 | 0.234659884  | 0.21458832 |
| P34932 | HSPA4    | Heat shock 70 kDa protein 4                                          | 0.987829215 | 0.925242389 | -0.094430274 | 0.21733314 |
| P38606 | ATP6V1A  | V-type proton ATPase catalytic subunit A                             | 0.992606478 | 1.035235146 | 0.060664727  | 0.22177073 |
| P47755 | CAPZA2   | F-actin-capping protein subunit alpha-2                              | 1.02801484  | 1.119073588 | 0.122443818  | 0.24712946 |
| P99999 | CYCS     | Cytochrome c                                                         | 0.89444553  | 0.826668266 | -0.113685122 | 0.30233051 |
| Q9H0U4 | RAB1B    | Ras-related protein Rab-1B                                           | 0.945120462 | 0.993153927 | 0.071519114  | 0.31475079 |
| P04899 | GNAI2    | Guanine nucleotide-binding protein G(i) subunit alpha-2              | 1.051655047 | 1.185298649 | 0.172589043  | 0.33557953 |
| P13611 | VCAN     | Versican core protein                                                | 0.974697232 | 1.038107932 | 0.090930396  | 0.33705854 |
| O75955 | FLOT1    | Flotillin-1                                                          | 1.013383963 | 1.123397853 | 0.148688047  | 0.35835031 |
| P62195 | PSMC5    | 26S protease regulatory subunit 8                                    | 0.908257979 | 0.982350721 | 0.113136056  | 0.36305189 |
| P32418 | SLC8A1   | Sodium/calcium exchanger 1                                           | 1.108430231 | 1.175848325 | 0.085184013  | 0.36501147 |
| Q07960 | ARHGAP1  | Rho GTPase-activating protein 1                                      | 0.924771696 | 0.98473306  | 0.090635451  | 0.36655034 |
| Q15435 | PPP1R7   | Protein phosphatase 1 regulatory subunit 7                           | 1.025136062 | 1.060249956 | 0.048589018  | 0.38661739 |
| Q9H310 | RHBG     | Ammonium transporter Rh type B                                       | 0.975917126 | 0.928796303 | -0.071396411 | 0.42309181 |
| P11216 | PYGB     | Glycogen phosphorylase, brain form                                   | 0.980069278 | 1.004690174 | 0.035795035  | 0.42637202 |

# SUPPLEMENTARY DATA

|        |          |                                                                  |             |             |              |            |
|--------|----------|------------------------------------------------------------------|-------------|-------------|--------------|------------|
| P67936 | TPM4     | Tropomyosin alpha-4 chain                                        | 0.974545662 | 1.014051857 | 0.057329742  | 0.42864394 |
| Q9BTV4 | TMEM43   | Transmembrane protein 43                                         | 0.811647486 | 0.881259848 | 0.118714201  | 0.43256011 |
| P06733 | ENO1     | Alpha-enolase                                                    | 0.99820772  | 1.038512826 | 0.057107067  | 0.43340158 |
| Q5TF21 | SOGA3    | Protein SOGA3                                                    | 1.294982056 | 1.469052338 | 0.181953688  | 0.46284987 |
| O15484 | CAPN5    | Calpain-5                                                        | 0.870431427 | 0.899323366 | 0.047109306  | 0.51268297 |
| P13489 | RNH1     | Ribonuclease inhibitor                                           | 0.929891782 | 0.889765914 | -0.063636999 | 0.54300615 |
| Q9UHY7 | ENOPH1   | Enolase-phosphatase E1                                           | 0.978369157 | 0.950309144 | -0.041982013 | 0.60934112 |
| P04075 | ALDOA    | Fructose-bisphosphate aldolase A                                 | 1.019138455 | 0.997827021 | -0.030488418 | 0.64241383 |
| Q9UM19 | HPCAL4   | Hippocalcin-like protein 4                                       | 0.839685212 | 0.823934451 | -0.027319012 | 0.65052604 |
| Q9UQB3 | CTNND2   | Catenin delta-2                                                  | 0.868997718 | 0.848509374 | -0.03442179  | 0.65755074 |
| Q9UPR5 | SLC8A2   | Sodium/calcium exchanger 2                                       | 0.924714041 | 0.949806497 | 0.038626329  | 0.66826856 |
| Q9ULX5 | RNF112   | RING finger protein 112                                          | 0.814440483 | 0.861545206 | 0.081117222  | 0.66860068 |
| P62826 | RAN      | GTP-binding nuclear protein Ran                                  | 1.013278239 | 1.060360988 | 0.065525115  | 0.67289759 |
| O43581 | SYT7     | Synaptotagmin-7                                                  | 0.830915867 | 0.873565429 | 0.072213358  | 0.67786183 |
| P20073 | ANXA7    | Annexin A7                                                       | 1.04515621  | 1.063852556 | 0.02557963   | 0.68930663 |
| P09972 | ALDOC    | Fructose-bisphosphate aldolase C                                 | 1.022944023 | 1.036230975 | 0.018618414  | 0.77697628 |
| P61106 | RAB14    | Ras-related protein Rab-14                                       | 0.924079309 | 0.90855531  | -0.024442331 | 0.81671628 |
| P14927 | UQCRB    | Cytochrome b-c1 complex subunit 7                                | 1.257935813 | 1.267751791 | 0.011214003  | 0.93243293 |
| P63104 | YWHAZ    | 14-3-3 protein zeta/delta                                        | 0.964347175 | 0.966711452 | 0.003532707  | 0.96569064 |
| P08758 | ANXA5    | Annexin A5                                                       | 1.03930865  | 0.912790609 | -0.18726831  | 0.24028784 |
| Q01814 | ATP2B2   | Plasma membrane calcium-transporting ATPase 2                    | 1.015809141 | 1.088256274 | 0.099388976  | 0.25709612 |
| P68366 | TUBA4A   | Tubulin alpha-4A chain                                           | 0.895734589 | 0.943646518 | 0.075175222  | 0.26062854 |
| Q06124 | PTPN11   | Tyrosine-protein phosphatase non-receptor type 11                | 1.007122439 | 1.123242591 | 0.15743046   | 0.28418039 |
| P63010 | AP2B1    | AP-2 complex subunit beta                                        | 0.966812525 | 0.93957615  | -0.04122607  | 0.30118835 |
| Q9NRW1 | RAB6B    | Ras-related protein Rab-6B                                       | 0.948629676 | 1.004940262 | 0.083192838  | 0.36835636 |
| P10768 | ESD      | S-formylglutathione hydrolase                                    | 1.006953946 | 1.061705584 | 0.076386053  | 0.37611532 |
| Q9NQ66 | PLCB1    | 1-phosphatidylinositol 4,5-bisphosphate phosphodiesterase beta-1 | 1.046102365 | 1.104516342 | 0.078390733  | 0.40973947 |
| Q9ULU8 | CADPS    | Calcium-dependent secretion activator 1                          | 0.940692587 | 0.98183518  | 0.061757526  | 0.41237438 |
| P21266 | GSTM3    | Glutathione S-transferase Mu 3                                   | 0.977636747 | 1.050755405 | 0.104056458  | 0.42645556 |
| P05091 | ALDH2    | Aldehyde dehydrogenase, mitochondrial                            | 1.074683731 | 1.039121866 | -0.048547291 | 0.45732017 |
| P48163 | ME1      | NADP-dependent malic enzyme                                      | 1.054212774 | 0.989240389 | -0.091773029 | 0.479088   |
| P15311 | EZR      | Ezrin                                                            | 0.978627473 | 0.949779777 | -0.043166745 | 0.52798404 |
| Q7Z6G3 | NECAB2   | N-terminal EF-hand calcium-binding protein 2                     | 1.009737174 | 1.050308795 | 0.056833729  | 0.53854102 |
| O60331 | PIP5K1C  | Phosphatidylinositol 4-phosphate 5-kinase type-1 gamma           | 1.112444476 | 1.143542456 | 0.039776599  | 0.55611696 |
| P54289 | CACNA2D1 | Voltage-dependent calcium channel subunit alpha-2/delta-1        | 0.964302173 | 0.924255916 | -0.061192926 | 0.56102103 |
| Q8NCB2 | CAMKV    | CaM kinase-like vesicle-associated protein                       | 1.013771525 | 1.045452462 | 0.044394916  | 0.56131346 |
| Q12860 | CNTN1    | Contactin-1                                                      | 0.993146908 | 0.943603782 | -0.073825939 | 0.57380665 |
| P07900 | HSP90AA1 | Heat shock protein HSP 90-alpha                                  | 0.968066868 | 0.99476878  | 0.039254527  | 0.59467619 |
| O60641 | SNAP91   | Clathrin coat assembly protein AP180                             | 0.73926808  | 0.824756349 | 0.157870356  | 0.60386309 |

# SUPPLEMENTARY DATA

|        |          |                                                                                                                  |             |             |              |            |
|--------|----------|------------------------------------------------------------------------------------------------------------------|-------------|-------------|--------------|------------|
| P29218 | IMPA1    | Inositol monophosphatase 1                                                                                       | 1.013256326 | 0.985691932 | -0.03979046  | 0.644785   |
| Q15293 | RCN1     | Reticulocalbin-1                                                                                                 | 0.999113874 | 0.974315326 | -0.036260359 | 0.68490195 |
| P63096 | GNAI1    | Guanine nucleotide-binding protein G(i) subunit alpha-1                                                          | 0.824243486 | 0.851300039 | 0.046597115  | 0.7441918  |
| O00533 | CHL1     | Neural cell adhesion molecule L1-like protein                                                                    | 1.127638455 | 1.098414159 | -0.037882456 | 0.7619545  |
| P18505 | GABRB1   | Gamma-aminobutyric acid receptor subunit beta-1                                                                  | 1.051258716 | 1.036389744 | -0.020551117 | 0.7905148  |
| O60675 | MAFK     | Transcription factor MafK                                                                                        | 1.120955325 | 1.109139736 | -0.015287645 | 0.938752   |
| P56134 | ATP5J2   | ATP synthase subunit f, mitochondrial                                                                            | 1.054582398 | 0.906027779 | -0.219044633 | 0.29643576 |
| Q7L099 | RUFY3    | Protein RUFY3                                                                                                    | 1.007708686 | 1.081881451 | 0.102463785  | 0.31395863 |
| O14531 | DPYSL4   | Dihydropyrimidinase-related protein 4                                                                            | 1.144671132 | 1.279989717 | 0.161199054  | 0.31818314 |
| P28472 | GABRB3   | Gamma-aminobutyric acid receptor subunit beta-3                                                                  | 1.080940046 | 0.992936244 | -0.122513516 | 0.33208451 |
| Q14416 | GRM2     | Metabotropic glutamate receptor 2                                                                                | 0.982950543 | 1.131608413 | 0.203184073  | 0.3477447  |
| P13637 | ATP1A3   | Sodium/potassium-transporting ATPase subunit alpha-3                                                             | 1.019379219 | 1.061378595 | 0.058248511  | 0.35284286 |
| O75935 | DCTN3    | Dynactin subunit 3                                                                                               | 1.091329041 | 1.191244151 | 0.126382984  | 0.35514975 |
| Q71U36 | TUBA1A   | Tubulin alpha-1A chain                                                                                           | 0.850296406 | 0.942193358 | 0.148057322  | 0.38510228 |
| Q05639 | EEF1A2   | Elongation factor 1-alpha 2                                                                                      | 0.999168965 | 0.961390687 | -0.055605838 | 0.39151036 |
| P35611 | ADD1     | Alpha-adducin                                                                                                    | 1.019064467 | 0.985397163 | -0.048468099 | 0.40041465 |
| O95336 | PGLS     | 6-phosphogluconolactonase                                                                                        | 0.982855309 | 1.044087644 | 0.087191871  | 0.40518037 |
| Q9NV96 | TMEM30A  | Cell cycle control protein 50A<br>Pyruvate dehydrogenase E1 component subunit alpha, somatic form, mitochondrial | 1.213346224 | 1.129378222 | -0.10346256  | 0.43387329 |
| P08559 | PDHA1    | Pyruvate dehydrogenase E1 component subunit alpha, somatic form, mitochondrial                                   | 1.072963199 | 1.007642699 | -0.090616431 | 0.43906596 |
| P14618 | PKM      | Pyruvate kinase PKM                                                                                              | 0.960259815 | 0.9978866   | 0.055451072  | 0.45262136 |
| P52306 | RAP1GDS1 | Rap1 GTPase-GDP dissociation stimulator 1                                                                        | 0.89617333  | 0.825337585 | -0.118793452 | 0.46365255 |
| Q9Y5K8 | ATP6V1D  | V-type proton ATPase subunit D                                                                                   | 1.082684824 | 1.150986213 | 0.088257226  | 0.47503975 |
| P20020 | ATP2B1   | Plasma membrane calcium-transporting ATPase 1                                                                    | 0.915296617 | 0.954414402 | 0.060376465  | 0.49373863 |
| O00429 | DNM1L    | Dynammin-1-like protein                                                                                          | 0.961251902 | 0.985973961 | 0.036634999  | 0.49443703 |
| Q13367 | AP3B2    | AP-3 complex subunit beta-2                                                                                      | 0.916066309 | 0.955853607 | 0.06133765   | 0.51066726 |
| P36915 | GNL1     | Guanine nucleotide-binding protein-like 1                                                                        | 0.964288328 | 1.019158991 | 0.079842643  | 0.51186582 |
| P21579 | SYT1     | Synaptotagmin-1                                                                                                  | 0.974276183 | 0.950612774 | -0.03547301  | 0.51637687 |
| P53680 | AP2S1    | AP-2 complex subunit sigma                                                                                       | 1.032645787 | 1.067191194 | 0.047473195  | 0.59043012 |
| P09543 | CNP      | 2,3-cyclic-nucleotide 3-phosphodiesterase                                                                        | 1.016460548 | 0.977928469 | -0.055753374 | 0.60269622 |
| P05186 | ALPL     | Alkaline phosphatase, tissue-nonspecific isozyme                                                                 | 1.029721628 | 1.071336493 | 0.057157307  | 0.60566525 |
| Q16348 | SLC15A2  | Solute carrier family 15 member 2                                                                                | 0.986415479 | 0.945796544 | -0.060665569 | 0.63430599 |
| O94811 | TPPP     | Tubulin polymerization-promoting protein                                                                         | 0.976087947 | 1.002082967 | 0.037918913  | 0.63737977 |
| P78356 | PIP4K2B  | Phosphatidylinositol 5-phosphate 4-kinase type-2 beta                                                            | 0.95421541  | 0.986519523 | 0.048032617  | 0.6853027  |
| Q07954 | LRP1     | Pro-low-density lipoprotein receptor-related protein 1                                                           | 1.049626453 | 1.011958414 | -0.052725981 | 0.69920957 |
| O14576 | DYNC1I1  | Cytoplasmic dynein 1 intermediate chain 1                                                                        | 0.779951023 | 0.738216104 | -0.079340322 | 0.7105416  |
| P32119 | PRDX2    | Peroxiredoxin-2                                                                                                  | 1.004467875 | 1.025504516 | 0.029902421  | 0.71538862 |
| P14136 | GFAP     | Glial fibrillary acidic protein                                                                                  | 0.952405631 | 0.934250544 | -0.027766652 | 0.77670186 |
| P14406 | COX7A2   | Cytochrome c oxidase subunit 7A2, mitochondrial                                                                  | 1.074166439 | 1.051756955 | -0.030416194 | 0.81335978 |



# SUPPLEMENTARY DATA

|            |               |                                                                                   |             |             |              |            |
|------------|---------------|-----------------------------------------------------------------------------------|-------------|-------------|--------------|------------|
| O14773     | TPP1          | Tripeptidyl-peptidase 1                                                           | 1.107076431 | 1.115849152 | 0.01138718   | 0.88383884 |
| Q9NQK4     | NIT2          | Omega-amidase NIT2                                                                | 0.86976434  | 0.860238808 | -0.015887343 | 0.88487127 |
| Q8N608     | DPP10         | Inactive dipeptidyl peptidase 10                                                  | 0.989626906 | 1.003383732 | 0.019916822  | 0.905885   |
| Q06732     | ZNF33B        | Zinc finger protein 33B                                                           | 1.164443034 | 1.189408382 | 0.030604086  | 0.91341812 |
| P11217     | PYGM          | Glycogen phosphorylase, muscle form                                               | 1.041652114 | 1.037434915 | -0.005852703 | 0.94779061 |
| P05067     | APP           | Amyloid beta A4 protein                                                           | 1.122867851 | 1.113694909 | -0.011834081 | 0.95245834 |
| Q15008     | PSMD6         | 26S proteasome non-ATPase regulatory subunit 6                                    | 1.022462811 | 1.027520278 | 0.007118495  | 0.95583479 |
| Q9UPV7     | KIAA1045      | Protein KIAA1045                                                                  | 0.956361807 | 0.957815206 | 0.002190824  | 0.98576276 |
| P30531     | SLC6A1        | Sodium- and chloride-dependent GABA transporter 1                                 | 0.872402576 | 1.06142736  | 0.282939707  | 0.2540137  |
| Q13200     | PSMD2         | 26S proteasome non-ATPase regulatory subunit 2                                    | 0.970004558 | 1.026287446 | 0.081371431  | 0.27579337 |
| P60174     | TPPI          | Triosephosphate isomerase                                                         | 0.919803266 | 1.061876617 | 0.20721892   | 0.32252493 |
| Q99880     | HIST1H2B<br>L | Histone H2B type 1-L                                                              | 0.966033672 | 1.035788437 | 0.100583976  | 0.38628255 |
| P12532     | CKMT1A        | Creatine kinase U-type, mitochondrial                                             | 1.01082686  | 1.072682847 | 0.085687681  | 0.40876001 |
| Q14204     | DYNC1H1       | Cytoplasmic dynein 1 heavy chain 1                                                | 0.978198527 | 1.012021004 | 0.049040036  | 0.41877956 |
| P17174     | GOT1          | Aspartate aminotransferase, cytoplasmic                                           | 1.289030011 | 1.09646624  | -0.23342446  | 0.47032646 |
| Q13561     | DCTN2         | Dynactin subunit 2                                                                | 0.995030054 | 0.95730044  | -0.055768329 | 0.51344237 |
| Q8WUW<br>1 | BRK1          | Protein BRICK1                                                                    | 1.055724289 | 1.077043642 | 0.028843597  | 0.53366109 |
| Q92752     | TNR           | Tenascin-R                                                                        | 1.007799191 | 0.958769326 | -0.071952544 | 0.54744707 |
| P63151     | PPP2R2A       | Serine/threonine-protein phosphatase 2A 55 kDa regulatory subunit B alpha isoform | 0.944883718 | 0.991342002 | 0.069246063  | 0.5981944  |
| Q8WUM4     | PDCD6IP       | Programmed cell death 6-interacting protein                                       | 0.916261065 | 0.889249984 | -0.043169672 | 0.61716277 |
| P10909     | CLU           | Clusterin                                                                         | 0.981728166 | 0.939745204 | -0.06305396  | 0.61762964 |
| Q13554     | CAMK2B        | Calcium/calmodulin-dependent protein kinase type II subunit beta                  | 0.932571744 | 0.952355568 | 0.030285596  | 0.6440191  |
| Q92599     | SEP8          | Septin-8                                                                          | 1.039827314 | 1.080064275 | 0.054773213  | 0.70094624 |
| Q8N9R8     | SCAI          | Protein SCAI                                                                      | 0.996070085 | 0.98006003  | -0.023377138 | 0.7073858  |
| P15104     | GLUL          | Glutamine synthetase                                                              | 0.964303509 | 0.987889526 | 0.034862419  | 0.71272162 |
| Q9UHG2     | PCSK1N        | ProSAAS                                                                           | 1.098536034 | 1.074402091 | -0.032048176 | 0.76114798 |
| Q14894     | CRYM          | Ketimine reductase mu-crystallin                                                  | 1.032169198 | 1.021445088 | -0.015067834 | 0.76868143 |
| P05771     | PRKCB         | Protein kinase C beta type                                                        | 0.809437161 | 0.795711752 | -0.024673178 | 0.820276   |
| Q9H2X9     | SLC12A5       | Solute carrier family 12 member 5                                                 | 1.002439378 | 1.017961611 | 0.022168164  | 0.85765623 |
| P14854     | COX6B1        | Cytochrome c oxidase subunit 6B1                                                  | 1.231708994 | 1.035887597 | -0.249793976 | 0.20103366 |
| Q9H2M9     | RAB3GAP2      | Rab3 GTPase-activating protein non-catalytic subunit                              | 0.952531499 | 0.852728757 | -0.159679893 | 0.36180439 |
| P48169     | GABRA4        | Gamma-aminobutyric acid receptor subunit alpha-4                                  | 0.921257111 | 0.976828168 | 0.084500952  | 0.3952279  |
| Q9UHG3     | PCYOX1        | Preylcysteine oxidase 1                                                           | 1.040791749 | 1.103461432 | 0.084354777  | 0.41332178 |
| P17858     | PFKL          | ATP-dependent 6-phosphofructokinase, liver type                                   | 0.958664012 | 1.006947037 | 0.070890623  | 0.47487943 |
| Q7L0J3     | SV2A          | Synaptic vesicle glycoprotein 2A                                                  | 1.02958064  | 1.077535651 | 0.065678772  | 0.47687769 |
| P51674     | GPM6A         | Neuronal membrane glycoprotein M6-a                                               | 1.030152758 | 1.13930434  | 0.145294897  | 0.49604037 |
| P07203     | GPX1          | Glutathione peroxidase 1                                                          | 0.947108894 | 0.912777342 | -0.05326733  | 0.50604709 |
| P31948     | STIP1         | Stress-induced-phosphoprotein 1                                                   | 0.996412493 | 1.044524513 | 0.068031335  | 0.51974713 |

# SUPPLEMENTARY DATA

|        |         |                                                                   |             |             |              |            |
|--------|---------|-------------------------------------------------------------------|-------------|-------------|--------------|------------|
| Q9HCJ6 | VAT1L   | Synaptic vesicle membrane protein VAT-1 homolog-like              | 0.911806266 | 0.981699392 | 0.106553999  | 0.53802028 |
| P20936 | RASA1   | Ras GTPase-activating protein 1                                   | 0.890787208 | 0.847194246 | -0.072388049 | 0.54634391 |
| P13591 | NCAM1   | Neural cell adhesion molecule 1                                   | 0.993409613 | 0.957820113 | -0.052633977 | 0.57148215 |
| Q01082 | SPTBN1  | Spectrin beta chain, non-erythrocytic 1                           | 0.93079878  | 0.954454119 | 0.036206529  | 0.59819432 |
| Q9BT78 | COPS4   | COP9 signalosome complex subunit 4                                | 0.93544429  | 0.977835631 | 0.06394024   | 0.60184186 |
| P37235 | HPCAL1  | Hippocalcin-like protein 1                                        | 1.00026747  | 0.979248618 | -0.030638735 | 0.60877535 |
| P49418 | AMPH    | Amphiphysin                                                       | 1.024006302 | 1.002636635 | -0.03042574  | 0.61869004 |
| Q9Y4L1 | HYOU1   | Hypoxia up-regulated protein 1                                    | 1.112171623 | 1.164693189 | 0.066570529  | 0.62072056 |
| P30085 | CMPK1   | UMP-CMP kinase                                                    | 0.938234674 | 0.909608532 | -0.044703032 | 0.62272504 |
| Q8N126 | CADM3   | Cell adhesion molecule 3                                          | 1.168014695 | 1.225452693 | 0.069256367  | 0.65336934 |
| Q3ZCW2 | LGALS3  | Galectin-related protein                                          | 0.852977963 | 0.830143319 | -0.039148038 | 0.65886681 |
| Q9UBS5 | GABBR1  | Gamma-aminobutyric acid type B receptor subunit 1                 | 0.80401649  | 0.754596736 | -0.091519233 | 0.69627777 |
| Q9H313 | TTYH1   | Protein tweety homolog 1                                          | 1.030797588 | 1.043525108 | 0.017704247  | 0.71956656 |
| P61981 | YWHAG   | 14-3-3 protein gamma                                              | 0.834126926 | 0.865798611 | 0.053764557  | 0.73332067 |
| P11142 | HSPA8   | Heat shock cognate 71 kDa protein                                 | 0.990712162 | 1.009929979 | 0.027717402  | 0.74204    |
| P61457 | PCBD1   | Pterin-4-alpha-carbinolamine dehydratase                          | 0.808948434 | 0.770082293 | -0.071035118 | 0.75505012 |
| O14880 | MGST3   | Microsomal glutathione S-transferase 3                            | 1.001311781 | 0.968050468 | -0.048737093 | 0.75734069 |
| P02792 | FTL     | Ferritin light chain                                              | 0.920053581 | 0.940593443 | 0.031853394  | 0.75839909 |
| P60201 | PLP1    | Myelin proteolipid protein                                        | 1.14096735  | 1.219244393 | 0.09572983   | 0.76312129 |
| Q14697 | GANAB   | Neutral alpha-glucosidase AB                                      | 1.021144731 | 1.058810327 | 0.052256812  | 0.76514817 |
| P23468 | PTPRD   | Receptor-type tyrosine-protein phosphatase delta                  | 0.949359812 | 0.938381844 | -0.016779879 | 0.79489169 |
| Q15365 | PCBP1   | Poly(rC)-binding protein 1                                        | 0.967396182 | 0.990186639 | 0.033593639  | 0.79940571 |
| P10301 | RRAS    | Ras-related protein R-Ras                                         | 1.008558946 | 0.992779698 | -0.022749889 | 0.83478561 |
| Q15149 | PLEC    | Plectin                                                           | 0.988976192 | 0.997648167 | 0.01259533   | 0.83596063 |
| O15075 | DCLK1   | Serine/threonine-protein kinase DCLK1                             | 0.982567392 | 0.972142077 | -0.015389186 | 0.83780497 |
| Q99460 | PSMD1   | 26S proteasome non-ATPase regulatory subunit 1                    | 1.011509099 | 0.989317931 | -0.032003166 | 0.84707522 |
| P04406 | GAPDH   | Glyceraldehyde-3-phosphate dehydrogenase                          | 0.865745965 | 0.874414747 | 0.014373974  | 0.85318067 |
| Q9UM22 | EPDR1   | Mammalian ependymin-related protein 1                             | 1.018741997 | 1.005573751 | -0.01876983  | 0.85618313 |
| P61586 | RHOA    | Transforming protein RhoA                                         | 0.984702307 | 0.992450981 | 0.011308209  | 0.85984902 |
| Q9H299 | SH3BGL3 | SH3 domain-binding glutamic acid-rich-like protein 3              | 0.89880585  | 0.884415853 | -0.023284629 | 0.87851704 |
| P07355 | ANXA2   | Annexin A2                                                        | 0.971459233 | 0.957196685 | -0.021338055 | 0.8800228  |
| Q14156 | EFR3A   | Protein EFR3 homolog A                                            | 0.936935662 | 0.958195505 | 0.032370061  | 0.91289581 |
| Q9Y2J2 | EPB41L3 | Band 4.1-like protein 3                                           | 0.929865326 | 0.943622901 | 0.021188649  | 0.91381151 |
| Q14642 | INPP5A  | Type I inositol 1,4,5-trisphosphate 5-phosphatase                 | 0.810181066 | 0.798436114 | -0.021067394 | 0.91867531 |
| Q8IZP0 | ABI1    | Abl interactor 1                                                  | 0.951560688 | 0.958001961 | 0.009732938  | 0.93046303 |
| O60262 | GNG7    | Guanine nucleotide-binding protein G(I)/G(S)/G(O) subunit gamma-7 | 0.947616073 | 0.94161153  | -0.009170684 | 0.93126266 |
| Q9UJU6 | DBNL    | Drebrin-like protein                                              | 0.945229485 | 1.029726086 | 0.123524084  | 0.44060201 |
| P52209 | PGD     | 6-phosphogluconate dehydrogenase, decarboxylating                 | 1.292823708 | 1.140773512 | -0.18051317  | 0.47506953 |
| Q9BTU6 | PI4K2A  | Phosphatidylinositol 4-kinase type 2-alpha                        | 1.065005342 | 0.994060144 | -0.09945562  | 0.4831287  |



# SUPPLEMENTARY DATA

|        |           |                                                            |             |             |              |            |
|--------|-----------|------------------------------------------------------------|-------------|-------------|--------------|------------|
| P36405 | ARL3      | ADP-ribosylation factor-like protein 3                     | 0.963812012 | 0.913266921 | -0.077715204 | 0.49119433 |
| P61026 | RAB10     | Ras-related protein Rab-10                                 | 0.946309031 | 1.015582999 | 0.101924851  | 0.50002155 |
| P60953 | CDC42     | Cell division control protein 42 homolog                   | 0.917981303 | 0.96466487  | 0.071563059  | 0.51760713 |
| O94919 | ENDOD1    | Endonuclease domain-containing 1 protein                   | 1.044258623 | 1.018969247 | -0.035368546 | 0.54433035 |
| Q9HAV0 | GNB4      | Guanine nucleotide-binding protein subunit beta-4          | 1.073580933 | 1.139255067 | 0.085659834  | 0.57190596 |
| O75899 | GABBR2    | Gamma-aminobutyric acid type B receptor subunit 2          | 1.148058154 | 1.102220692 | -0.058782606 | 0.59045737 |
| P19086 | GNAZ      | Guanine nucleotide-binding protein G(z) subunit alpha      | 1.074511939 | 1.150658583 | 0.098778315  | 0.59793368 |
| P07339 | CTSD      | Cathepsin D                                                | 1.046750254 | 1.12846248  | 0.108441183  | 0.60239163 |
| Q7L576 | CYFIP1    | Cytoplasmic FMR1-interacting protein 1                     | 0.998871506 | 1.016754055 | 0.025599736  | 0.62240015 |
| Q8TDJ6 | DMXL2     | DmX-like protein 2                                         | 0.960961268 | 0.931175442 | -0.045425274 | 0.68558407 |
| Q9NP72 | RAB18     | Ras-related protein Rab-18                                 | 0.923265166 | 0.893403304 | -0.047433465 | 0.68615736 |
| Q9Y617 | PSAT1     | Phosphoserine aminotransferase                             | 0.940009991 | 0.977354333 | 0.056205605  | 0.68901764 |
| P68871 | HBB       | Hemoglobin subunit beta                                    | 0.9588764   | 0.993274866 | 0.050848142  | 0.7241499  |
| P17066 | HSPA6     | Heat shock 70 kDa protein 6                                | 0.972789266 | 1.000462038 | 0.04046721   | 0.73199415 |
| P59998 | ARPC4     | Actin-related protein 2/3 complex subunit 4                | 0.952682165 | 0.962224364 | 0.014378349  | 0.73294665 |
| P42858 | HTT       | Huntingtin                                                 | 1.002084531 | 1.020473286 | 0.026234203  | 0.77643219 |
| O43236 | SEP4      | Septin-4                                                   | 0.769291041 | 0.744168396 | -0.047900384 | 0.84175599 |
| Q96RR4 | CAMKK2    | Calcium/calmodulin-dependent protein kinase kinase 2       | 1.129474512 | 1.104787425 | -0.031882911 | 0.84613301 |
| Q9UPN3 | MACF1     | Microtubule-actin cross-linking factor 1, isoforms 1/2/3/5 | 0.958740373 | 0.967511217 | 0.013138202  | 0.87336973 |
| Q99878 | HIST1H2AJ | Histone H2A type 1-J                                       | 1.332816669 | 1.308013123 | -0.027101335 | 0.9027415  |
| Q9H115 | NAPB      | Beta-soluble NSF attachment protein                        | 0.931806865 | 0.939377159 | 0.011673555  | 0.90684385 |
| O75335 | PPFIA4    | Liprin-alpha-4                                             | 0.940347345 | 0.948951878 | 0.013141172  | 0.91005623 |
| Q15811 | ITSN1     | Intersectin-1                                              | 1.05431105  | 1.046784433 | -0.010336188 | 0.91903675 |
| Q13813 | SPTAN1    | Spectrin alpha chain, non-erythrocytic 1                   | 0.962086266 | 0.965991974 | 0.005844943  | 0.92401978 |
| Q9H8M5 | CNNM2     | Metal transporter CNNM2                                    | 0.999401799 | 0.990098791 | -0.013492331 | 0.92841731 |
| Q9P2U7 | SLC17A7   | Vesicular glutamate transporter 1                          | 1.035672868 | 1.038831513 | 0.004393305  | 0.95221595 |
| P68036 | UBE2L3    | Ubiquitin-conjugating enzyme E2 L3                         | 1.058887314 | 1.063960304 | 0.006895258  | 0.95665174 |
| P62987 | UBA52     | Ubiquitin-60S ribosomal protein L40                        | 0.858148109 | 0.861358893 | 0.005387808  | 0.97853762 |
| P00558 | PGK1      | Phosphoglycerate kinase 1                                  | 1.033152528 | 1.035360774 | 0.003080306  | 0.97885264 |
| P43003 | SLC1A3    | Excitatory amino acid transporter 1                        | 1.028235952 | 1.024516641 | -0.005227944 | 0.98220054 |
| P23381 | WARS      | Tryptophan--tRNA ligase, cytoplasmic                       | 1.01901396  | 1.02044034  | 0.002018023  | 0.98859842 |
| P78559 | MAP1A     | Microtubule-associated protein 1A                          | 1.112493303 | 1.040165261 | -0.09698389  | 0.33024439 |
| P30041 | PRDX6     | Peroxiredoxin-6                                            | 0.961720348 | 1.006258018 | 0.06531093   | 0.38750031 |
| P78371 | CCT2      | T-complex protein 1 subunit beta                           | 1.030798714 | 1.058393519 | 0.038113491  | 0.45070568 |
| P01303 | NPY       | Pro-neuropeptide Y                                         | 0.998079186 | 0.935574818 | -0.093301251 | 0.45154191 |
| Q16653 | MOG       | Myelin-oligodendrocyte glycoprotein                        | 1.084757152 | 1.383163233 | 0.350599327  | 0.46081655 |
| Q01484 | ANK2      | Ankyrin-2                                                  | 0.998836428 | 0.970429158 | -0.04162554  | 0.51835986 |
| P40123 | CAP2      | Adenylyl cyclase-associated protein 2                      | 0.978821128 | 1.033044823 | 0.077785705  | 0.53413401 |
| P31939 | ATIC      | Bifunctional purine biosynthesis protein PURH              | 0.980328447 | 1.017623104 | 0.053866237  | 0.55312712 |

# SUPPLEMENTARY DATA

|        |            |                                                                                   |             |             |              |            |
|--------|------------|-----------------------------------------------------------------------------------|-------------|-------------|--------------|------------|
| P62937 | PPIA       | Peptidyl-prolyl cis-trans isomerase A                                             | 0.905235278 | 0.946922264 | 0.064953186  | 0.59535736 |
| P00492 | HPRT1      | Hypoxanthine-guanine phosphoribosyltransferase                                    | 0.906136569 | 0.86449509  | -0.067870733 | 0.60436587 |
| O43157 | PLXNB1     | Plexin-B1                                                                         | 1.221430029 | 1.270607007 | 0.056946661  | 0.63872551 |
| P22694 | PRKACB     | cAMP-dependent protein kinase catalytic subunit beta                              | 0.967288783 | 0.956707121 | -0.015869331 | 0.6749739  |
| P02763 | ORM1       | Alpha-1-acid glycoprotein 1                                                       | 0.923236093 | 0.971879306 | 0.074077536  | 0.67670267 |
| P43034 | PAFAH1B1   | Platelet-activating factor acetylhydrolase IB subunit alpha                       | 1.016259638 | 1.045143497 | 0.040432003  | 0.67966766 |
| P31323 | PRKAR2B    | cAMP-dependent protein kinase type II-beta regulatory subunit                     | 0.989808188 | 1.005799628 | 0.023122043  | 0.71133246 |
| Q13153 | PAK1       | Serine/threonine-protein kinase PAK 1                                             | 1.13895777  | 1.220166466 | 0.09936373   | 0.74609023 |
| P04792 | HSPB1      | Heat shock protein beta-1                                                         | 0.984682974 | 1.006680899 | 0.031875228  | 0.75624336 |
| P50993 | ATP1A2     | Sodium/potassium-transporting ATPase subunit alpha-2                              | 0.963949532 | 0.955810883 | -0.01223242  | 0.79103144 |
| Q16643 | DBN1       | Drebrin                                                                           | 0.894020478 | 0.8811658   | -0.020894376 | 0.80853493 |
| Q9BQI5 | SGIP1      | SH3-containing GRB2-like protein 3-interacting protein 1                          | 1.020898475 | 1.00409676  | -0.0239411   | 0.81197823 |
| P61764 | STXBP1     | Syntaxin-binding protein 1                                                        | 0.990141814 | 1.004110586 | 0.02021109   | 0.81763031 |
| Q15084 | PDIA6      | Protein disulfide-isomerase A6                                                    | 1.021879509 | 1.040741749 | 0.026387025  | 0.82038545 |
| P43007 | SLC1A4     | Neutral amino acid transporter A                                                  | 1.041828939 | 1.065020423 | 0.031762679  | 0.84340184 |
| Q9NZQ3 | NCKIPSD    | NCK-interacting protein with SH3 domain                                           | 0.901403555 | 0.912809378 | 0.018140474  | 0.8763386  |
| Q9P035 | HACD3      | Very-long-chain (3R)-3-hydroxyacyl-CoA dehydratase 3                              | 0.916254637 | 0.929502162 | 0.020709627  | 0.88744817 |
| Q15286 | RAB35      | Ras-related protein Rab-35                                                        | 0.872231359 | 0.880689147 | 0.013922028  | 0.88831387 |
| P11166 | SLC2A1     | Solute carrier family 2, facilitated glucose transporter member 1                 | 0.907652445 | 0.936919229 | 0.045784708  | 0.88865022 |
| P21281 | ATP6V1B2   | V-type proton ATPase subunit B, brain isoform                                     | 0.907360379 | 0.912953495 | 0.008865708  | 0.90839836 |
| P48066 | SLC6A11    | Sodium- and chloride-dependent GABA transporter 3                                 | 0.943605725 | 0.950418478 | 0.010378714  | 0.93464992 |
| P08238 | HSP90AB1   | Heat shock protein HSP 90-beta                                                    | 1.040270779 | 1.04234232  | 0.002870051  | 0.96974421 |
| P18507 | GABRG2     | Gamma-aminobutyric acid receptor subunit gamma-2                                  | 1.060311656 | 1.060243043 | -9.336E-05   | 0.99960802 |
| O75436 | VPS26A     | Vacuolar protein sorting-associated protein 26A                                   | 0.966015407 | 1.044679789 | 0.112942696  | 0.52219454 |
| O00139 | KIF2A      | Kinesin-like protein KIF2A                                                        | 1.198737893 | 1.077465001 | -0.153875237 | 0.52599284 |
| O95670 | ATP6V1G2   | V-type proton ATPase subunit G 2                                                  | 0.987562097 | 1.030998776 | 0.062099249  | 0.55858005 |
| P42263 | GRIA3      | Glutamate receptor 3                                                              | 1.032108278 | 1.084074563 | 0.070869657  | 0.61330481 |
| Q16537 | PPP2R5E    | Serine/threonine-protein phosphatase 2A 56 kDa regulatory subunit epsilon isoform | 0.904582967 | 0.934259663 | 0.046570749  | 0.62749967 |
| Q92871 | PMM1       | Phosphomannomutase 1                                                              | 0.934420912 | 0.974220264 | 0.06017543   | 0.6342303  |
| P14415 | ATP1B2     | Sodium/potassium-transporting ATPase subunit beta-2                               | 1.069908231 | 1.198242609 | 0.163432983  | 0.6443638  |
| P26885 | FKBP2      | Peptidyl-prolyl cis-trans isomerase FKBP2                                         | 0.880562899 | 0.92074666  | 0.0643782    | 0.65505049 |
| Q8TCU6 | PREX1      | Phosphatidylinositol 3,4,5-trisphosphate-dependent Rac exchanger 1 protein        | 1.12825646  | 1.190174261 | 0.077077783  | 0.6689053  |
| Q9UKU0 | ACSL6      | Long-chain-fatty-acid--CoA ligase 6                                               | 1.06710559  | 1.03590129  | -0.042816402 | 0.70032345 |
| Q32P51 | HNRNPA1 L2 | Heterogeneous nuclear ribonucleoprotein A1-like 2                                 | 1.006811938 | 0.978982794 | -0.040438818 | 0.74203669 |
| P13716 | ALAD       | Delta-aminolevulinic acid dehydratase                                             | 0.95092069  | 0.972658922 | 0.03260897   | 0.74258188 |
| Q9UH03 | SEP3       | Neuronal-specific septin-3                                                        | 0.885545487 | 0.899699021 | 0.022876038  | 0.78555027 |
| P21397 | MAOA       | Amine oxidase [flavin-containing] A                                               | 1.124450195 | 1.104924559 | -0.025271892 | 0.7863816  |
| P42658 | DPP6       | Dipeptidyl aminopeptidase-like protein 6                                          | 1.021219858 | 1.032079565 | 0.015260699  | 0.81395594 |

# SUPPLEMENTARY DATA

|        |          |                                                                         |             |             |              |            |
|--------|----------|-------------------------------------------------------------------------|-------------|-------------|--------------|------------|
| P62333 | PSMC6    | 26S protease regulatory subunit 10B                                     | 1.004232927 | 0.985715032 | -0.026851402 | 0.81819692 |
| Q01469 | FABP5    | Fatty acid-binding protein, epidermal                                   | 1.02916931  | 1.018822732 | -0.014577288 | 0.82348064 |
| P02686 | MBP      | Myelin basic protein                                                    | 1.00746326  | 0.988030025 | -0.028100439 | 0.83540151 |
| Q10567 | AP1B1    | AP-1 complex subunit beta-1                                             | 0.94843234  | 0.933589959 | -0.022755813 | 0.83980226 |
| P62258 | YWHAE    | 14-3-3 protein epsilon                                                  | 1.045908336 | 1.062093709 | 0.022154643  | 0.85597674 |
| Q15121 | PEA15    | Astrocytic phosphoprotein PEA-15                                        | 1.187198792 | 1.175437422 | -0.014363794 | 0.85980432 |
| P50995 | ANXA11   | Annexin A11                                                             | 1.070417317 | 1.064715669 | -0.007705149 | 0.88984449 |
| Q86YS7 | C2CD5    | C2 domain-containing protein 5                                          | 1.126330286 | 1.103521449 | -0.029515276 | 0.90782931 |
| P23763 | VAMP1    | Vesicle-associated membrane protein 1                                   | 0.895080115 | 0.885778585 | -0.015070701 | 0.91974689 |
| P04083 | ANXA1    | Annexin A1                                                              | 0.982271023 | 0.98860505  | 0.009273135  | 0.92002233 |
| Q15019 | SEP2     | Septin-2                                                                | 0.89840487  | 0.902633466 | 0.006774521  | 0.92558524 |
| P04179 | SOD2     | Superoxide dismutase [Mn], mitochondrial                                | 0.94728056  | 0.953429104 | 0.009333887  | 0.93250295 |
| P63092 | GNAS     | Guanine nucleotide-binding protein G(s) subunit alpha isoforms short    | 0.947043347 | 0.943848596 | -0.004875007 | 0.935863   |
| P68402 | PAFAH1B2 | Platelet-activating factor acetylhydrolase IB subunit beta              | 0.573672154 | 0.587274936 | 0.033809575  | 0.93838367 |
| P05129 | PRKCG    | Protein kinase C gamma type                                             | 0.903883521 | 0.908532331 | 0.007400983  | 0.95247314 |
| Q9Y2J8 | PADI2    | Protein-arginine deiminase type-2                                       | 1.089100709 | 1.091024505 | 0.00254614   | 0.96810733 |
| P38646 | HSPA9    | Stress-70 protein, mitochondrial                                        | 1.114612492 | 1.11304702  | -0.002027688 | 0.97465624 |
| P16949 | STMN1    | Stathmin                                                                | 1.016227582 | 1.017036158 | 0.001147444  | 0.98988816 |
| P23526 | AHCY     | Adenosylhomocysteinase                                                  | 1.029995672 | 1.029019306 | -0.001368225 | 0.99185568 |
| Q96CX2 | KCTD12   | BTB/POZ domain-containing protein KCTD12                                | 1.027048605 | 1.026627337 | -0.000591875 | 0.99715777 |
| Q16623 | STX1A    | Syntaxin-1A                                                             | 0.95789853  | 0.957893899 | -6.97454E-06 | 0.99992945 |
| Q9Y2I8 | WDR37    | WD repeat-containing protein 37                                         | 1.027024128 | 1.079774255 | 0.072259649  | 0.53559528 |
| P67775 | PPP2CA   | Serine/threonine-protein phosphatase 2A catalytic subunit alpha isoform | 0.988143642 | 1.027453464 | 0.056280372  | 0.5372854  |
| P08195 | SLC3A2   | 4F2 cell-surface antigen heavy chain                                    | 0.932010361 | 0.979049128 | 0.071035262  | 0.58132989 |
| P11177 | PDHB     | Pyruvate dehydrogenase E1 component subunit beta, mitochondrial         | 0.947681582 | 0.975452151 | 0.041668706  | 0.64025663 |
| Q14832 | GRM3     | Metabotropic glutamate receptor 3                                       | 1.190853754 | 1.237131235 | 0.0550023    | 0.66119543 |
| P46821 | MAP1B    | Microtubule-associated protein 1B                                       | 0.941389319 | 0.926318151 | -0.023283702 | 0.75752301 |
| P11137 | MAP2     | Microtubule-associated protein 2                                        | 1.066691626 | 1.089471035 | 0.030484679  | 0.76815523 |
| P35580 | MYH10    | Myosin-10                                                               | 1.075813967 | 1.095809936 | 0.026568966  | 0.77260038 |
| P78357 | CNTNAP1  | Contactin-associated protein 1                                          | 0.984296281 | 0.972791052 | -0.016962684 | 0.77397693 |
| Q08209 | PPP3CA   | Serine/threonine-protein phosphatase 2B catalytic subunit alpha isoform | 1.096513199 | 1.130703638 | 0.044297665  | 0.77610032 |
| Q86VP6 | CAND1    | Cullin-associated NEDD8-dissociated protein 1                           | 1.041619528 | 1.018930844 | -0.031772263 | 0.80527355 |
| P00441 | SOD1     | Superoxide dismutase [Cu-Zn]                                            | 0.977014057 | 0.964888552 | -0.018017004 | 0.82656995 |
| Q86TV6 | TTC7B    | Tetratricopeptide repeat protein 7B                                     | 0.857917142 | 0.843061882 | -0.025199787 | 0.84882104 |
| P62760 | VSNL1    | Visinin-like protein 1                                                  | 0.959865601 | 0.953847607 | -0.009073627 | 0.8930735  |
| P61225 | RAP2B    | Ras-related protein Rap-2b                                              | 1.178126863 | 1.151762335 | -0.032651851 | 0.9028149  |
| Q9UQ16 | DNM3     | Dynamin-3                                                               | 1.076891711 | 1.086119256 | 0.012309336  | 0.90781484 |
| Q9HDC9 | APMAP    | Adipocyte plasma membrane-associated protein                            | 1.035816609 | 1.040325767 | 0.006266767  | 0.95770426 |
| Q13636 | RAB31    | Ras-related protein Rab-31                                              | 0.860098424 | 0.904103037 | 0.071985438  | 0.48468362 |

# SUPPLEMENTARY DATA

|        |          |                                                     |             |             |              |            |
|--------|----------|-----------------------------------------------------|-------------|-------------|--------------|------------|
| Q9UN36 | NDRG2    | Protein NDRG2                                       | 1.029203441 | 1.13567917  | 0.142027144  | 0.52831519 |
| P47870 | GABRB2   | Gamma-aminobutyric acid receptor subunit beta-2     | 1.01207298  | 0.980894119 | -0.045144005 | 0.56020987 |
| P02730 | SLC4A1   | Band 3 anion transport protein                      | 0.856358244 | 0.930426148 | 0.11967719   | 0.61205964 |
| Q9Y6R1 | SLC4A4   | Electrogenic sodium bicarbonate cotransporter 1     | 1.064492823 | 1.146650603 | 0.10725963   | 0.64472437 |
| P08247 | SYP      | Synaptophysin                                       | 0.887832049 | 0.854574139 | -0.05508113  | 0.65864621 |
| O15254 | ACOX3    | Peroxisomal acyl-coenzyme A oxidase 3               | 1.000599934 | 0.958502959 | -0.062010471 | 0.66490175 |
| Q15819 | UBE2V2   | Ubiquitin-conjugating enzyme E2 variant 2           | 0.975344246 | 0.947673604 | -0.041521252 | 0.70780844 |
| Q02978 | SLC25A11 | Mitochondrial 2-oxoglutarate/malate carrier protein | 0.963906197 | 1.03202288  | 0.098510293  | 0.71527695 |
| P51659 | HSD17B4  | Peroxisomal multifunctional enzyme type 2           | 1.058454395 | 1.075463874 | 0.022999954  | 0.72242897 |
| P28070 | PSMB4    | Proteasome subunit beta type-4                      | 1.063424648 | 1.032268481 | -0.042899563 | 0.75709851 |
| O95782 | AP2A1    | AP-2 complex subunit alpha-1                        | 0.92836649  | 0.914387164 | -0.021889297 | 0.79491297 |
| O43813 | LANCL1   | LanC-like protein 1                                 | 0.943812406 | 0.951796571 | 0.012153122  | 0.81454551 |
| P43304 | GPD2     | Glycerol-3-phosphate dehydrogenase, mitochondrial   | 1.035383921 | 1.018219697 | -0.02411694  | 0.84977161 |
| P50990 | CCT8     | T-complex protein 1 subunit theta                   | 0.992624702 | 1.000709114 | 0.01170241   | 0.85054918 |
| P35222 | CTNNB1   | Catenin beta-1                                      | 1.091721863 | 1.082127359 | -0.012735044 | 0.85416796 |
| Q9P2D8 | UNC79    | Protein unc-79 homolog                              | 0.998344361 | 1.016003001 | 0.025295225  | 0.86611321 |
| P04216 | THY1     | Thy-1 membrane glycoprotein                         | 1.006659544 | 0.993087095 | -0.019583687 | 0.87289031 |
| Q92561 | PHYHIP   | Phytanoyl-CoA hydroxylase-interacting protein       | 1.080545586 | 1.104677305 | 0.031865057  | 0.87337719 |
| Q9BVA1 | TUBB2B   | Tubulin beta-2B chain                               | 1.026531076 | 1.011804398 | -0.020846887 | 0.87936217 |
| P46459 | NSF      | Vesicle-fusing ATPase                               | 0.945293777 | 0.939662383 | -0.008620262 | 0.88147444 |
| Q96CW1 | AP2M1    | AP-2 complex subunit mu                             | 0.98146203  | 0.987904766 | 0.009439518  | 0.88298737 |
| P06576 | ATP5B    | ATP synthase subunit beta, mitochondrial            | 0.91695938  | 0.904300059 | -0.020056269 | 0.89829292 |
| Q16181 | SEP7     | Septin-7                                            | 0.909586776 | 0.918058423 | 0.013374687  | 0.90205094 |
| Q9BR01 | SULT4A1  | Sulfotransferase 4A1                                | 1.102940515 | 1.093372696 | -0.01256973  | 0.92549859 |
| Q93050 | ATP6V0A1 | V-type proton ATPase 116 kDa subunit a isoform 1    | 0.99630315  | 0.999878115 | 0.005167456  | 0.93055833 |
| Q92686 | NRGN     | Neurogranin                                         | 0.920984454 | 0.931787822 | 0.016824671  | 0.93390678 |
| O75396 | SEC22B   | Vesicle-trafficking protein SEC22b                  | 0.907143586 | 0.901979947 | -0.008235563 | 0.95655172 |
| Q13509 | TUBB3    | Tubulin beta-3 chain                                | 0.989483476 | 0.994959836 | 0.007962675  | 0.96048068 |
| P0DMV9 | HSPA1B   | Heat shock 70 kDa protein 1B                        | 0.967748099 | 0.970947646 | 0.004761939  | 0.96448313 |
| P68371 | TUBB4B   | Tubulin beta-4B chain                               | 0.78403983  | 0.782465481 | -0.002899839 | 0.97884856 |
| P80404 | ABAT     | 4-aminobutyrate aminotransferase, mitochondrial     | 0.905620367 | 0.908633002 | 0.0047913    | 0.98132064 |
| P06756 | ITGAV    | Integrin alpha-V                                    | 0.942189607 | 0.942567981 | 0.000579256  | 0.99566391 |
| Q9H0E2 | TOLLIP   | Toll-interacting protein                            | 0.990113296 | 0.989982271 | -0.000190928 | 0.99873511 |

<sup>a</sup> The *p* .value was calculated by student's t. test.

# SUPPLEMENTARY DATA

**Supplementary Table 3.** Protein list of these modules which were significantly positive correlated with t-tau in WPCNA.

| Module | Uniprot ID | Gene Name | Correlation coefficient with t-tau | <i>p</i> -value |
|--------|------------|-----------|------------------------------------|-----------------|
| M7     | P10599     | TXN       | 0.513                              | 0.029421737     |
| M7     | P31150     | GDI1      | 0.140                              | 0.579155302     |
| M7     | P49368     | CCT3      | 0.527                              | 0.024632834     |
| M7     | P48147     | PREP      | 0.267                              | 0.283658808     |
| M7     | Q96CS3     | FAF2      | 0.453                              | 0.059242581     |
| M7     | O00154     | ACOT7     | -0.123                             | 0.627977179     |
| M7     | O15145     | ARPC3     | 0.206                              | 0.413298627     |
| M7     | P14867     | GABRA1    | -0.215                             | 0.392357649     |
| M7     | P47755     | CAPZA2    | 0.387                              | 0.113077719     |
| M7     | P32119     | PRDX2     | 0.117                              | 0.645154981     |
| M7     | P17858     | PFKL      | 0.523                              | 0.025809951     |
| M7     | Q9BT78     | COPS4     | 0.201                              | 0.423520693     |
| M7     | P10301     | RRAS      | 0.364                              | 0.137758387     |
| M7     | Q9UM22     | EPDR1     | -0.546                             | 0.019082681     |
| M7     | Q9UJU6     | DBNL      | 0.450                              | 0.060813274     |
| M7     | P60953     | CDC42     | 0.488                              | 0.039893026     |
| M7     | O75899     | GABBR2    | -0.601                             | 0.008366007     |
| M7     | P02763     | ORM1      | 0.745                              | 0.000390844     |
| M7     | Q9UH03     | SEP3      | 0.416                              | 0.085842439     |
| M8     | Q96P70     | IPO9      | 0.651                              | 0.003453692     |
| M8     | P08237     | PFKM      | 0.515                              | 0.028557577     |
| M8     | Q9GZN7     | ROGDI     | 0.531                              | 0.023209365     |
| M8     | Q92597     | NDRG1     | 0.323                              | 0.191425244     |
| M8     | O75955     | FLOT1     | 0.618                              | 0.006319354     |
| M8     | Q07960     | ARHGAP1   | 0.604                              | 0.007930549     |
| M8     | P21266     | GSTM3     | 0.541                              | 0.020427979     |
| M8     | Q16348     | SLC15A2   | -0.459                             | 0.055174269     |
| M8     | Q9Y4L1     | HYOU1     | 0.256                              | 0.304717015     |
| M8     | Q9UPN3     | MACF1     | 0.450                              | 0.060847528     |
| M8     | P68036     | UBE2L3    | 0.422                              | 0.081043724     |
| M8     | Q92871     | PMM1      | 0.635                              | 0.004657478     |
| M8     | Q01469     | FABP5     | -0.245                             | 0.327488491     |
| M8     | Q96CX2     | KCTD12    | 0.600                              | 0.008425607     |
| M8     | Q9Y2I8     | WDR37     | 0.414                              | 0.088023299     |
| M8     | Q9Y6R1     | SLC4A4    | 0.377                              | 0.122567177     |
| M8     | O15254     | ACOX3     | -0.577                             | 0.01214402      |
| M9     | P05023     | ATP1A1    | 0.281                              | 0.25801866      |

## SUPPLEMENTARY DATA

|    |        |          |        |             |
|----|--------|----------|--------|-------------|
| M9 | Q01518 | CAP1     | 0.764  | 0.000223132 |
| M9 | P61266 | STX1B    | 0.321  | 0.193597036 |
| M9 | P29401 | TKT      | 0.565  | 0.01457533  |
| M9 | Q9BY11 | PACSIN1  | 0.420  | 0.083062741 |
| M9 | O14807 | MRAS     | 0.475  | 0.04653766  |
| M9 | Q13098 | GPS1     | 0.574  | 0.012660324 |
| M9 | P55072 | VCP      | 0.609  | 0.007341998 |
| M9 | Q16658 | FSCN1    | 0.405  | 0.095215109 |
| M9 | Q92777 | SYN2     | 0.298  | 0.229427262 |
| M9 | P00338 | LDHA     | 0.347  | 0.158116541 |
| M9 | P62879 | GNB2     | 0.504  | 0.03296379  |
| M9 | Q14195 | DPYSL3   | 0.290  | 0.243031543 |
| M9 | P32418 | SLC8A1   | 0.609  | 0.007303928 |
| M9 | P62826 | RAN      | 0.433  | 0.0725384   |
| M9 | Q01814 | ATP2B2   | 0.577  | 0.012210381 |
| M9 | Q06124 | PTPN11   | -0.164 | 0.515156711 |
| M9 | Q9NRW1 | RAB6B    | 0.703  | 0.001145438 |
| M9 | P08559 | PDHA1    | -0.681 | 0.001858551 |
| M9 | Q92599 | SEP8     | 0.533  | 0.022874309 |
| M9 | P07203 | GPX1     | 0.215  | 0.390635238 |
| M9 | Q01082 | SPTBN1   | 0.428  | 0.076161132 |
| M9 | P61981 | YWHAG    | 0.552  | 0.017609773 |
| M9 | P23468 | PTPRD    | 0.660  | 0.002902167 |
| M9 | Q8IZP0 | ABI1     | 0.609  | 0.0073372   |
| M9 | P42858 | HTT      | 0.496  | 0.036300331 |
| M9 | Q13813 | SPTAN1   | 0.446  | 0.063471629 |
| M9 | P62987 | UBA52    | 0.643  | 0.003991753 |
| M9 | O43157 | PLXNB1   | 0.183  | 0.466898744 |
| M9 | P31323 | PRKAR2B  | -0.343 | 0.163705116 |
| M9 | Q15286 | RAB35    | 0.226  | 0.366586188 |
| M9 | P48066 | SLC6A11  | -0.768 | 0.000195714 |
| M9 | P16949 | STMN1    | 0.639  | 0.00428614  |
| M9 | Q16623 | STX1A    | 0.385  | 0.11478435  |
| M9 | P46821 | MAP1B    | 0.605  | 0.007825444 |
| M9 | Q9HDC9 | APMAP    | -0.386 | 0.113646658 |
| M9 | P08247 | SYP      | 0.443  | 0.065458088 |
| M9 | Q15819 | UBE2V2   | 0.711  | 0.000950248 |
| M9 | Q9BVA1 | TUBB2B   | -0.467 | 0.050875058 |
| M9 | P46459 | NSF      | 0.544  | 0.019513023 |
| M9 | Q9BR01 | SULT4A1  | 0.415  | 0.086856991 |
| M9 | Q93050 | ATP6V0A1 | -0.754 | 0.00030348  |
| M9 | Q92686 | NRGN     | 0.717  | 0.000809369 |

# SUPPLEMENTARY DATA

**Supplementary Table 4.** Gene ontology terms enrichment for M7, M8, M9, M10 and M11 modules in WPCNA.

| Module | Rank | Enrichment p.value | Term ID    | Term Ontology | Term Name                                                    | Term Definition                                                                                                                                                                                                         |
|--------|------|--------------------|------------|---------------|--------------------------------------------------------------|-------------------------------------------------------------------------------------------------------------------------------------------------------------------------------------------------------------------------|
| M7     | 1    | 0.001297017        | GO:0090317 | BP            | negative regulation of intracellular protein transport       | Any process that decreases the frequency, rate or extent of the directed movement of proteins within cells.                                                                                                             |
| M7     | 2    | 0.003136841        | GO:0051224 | BP            | negative regulation of protein transport                     | Any process that stops, prevents, or reduces the frequency, rate or extent of the directed movement of a protein into, out of or within a cell, or between cells, by means of some agent such as a transporter or pore. |
| M7     | 3    | 0.004376024        | GO:1904950 | BP            | negative regulation of establishment of protein localization | NA                                                                                                                                                                                                                      |
| M7     | 4    | 0.004455869        | GO:0110053 | BP            | regulation of actin filament organization                    | Any process that modulates the frequency, rate or extent of actin filament organization.                                                                                                                                |
| M7     | 5    | 0.00757723         | GO:0032956 | BP            | regulation of actin cytoskeleton organization                | Any process that modulates the frequency, rate or extent of the formation, arrangement of constituent parts, or disassembly of cytoskeletal structures comprising actin filaments and their associated proteins.        |
| M7     | 6    | 0.0120714          | GO:0032147 | BP            | activation of protein kinase activity                        | Any process that initiates the activity of an inactive protein kinase.                                                                                                                                                  |
| M7     | 7    | 0.012128936        | GO:0032387 | BP            | negative regulation of intracellular transport               | Any process that stops, prevents, or reduces the frequency, rate or extent of the directed movement of substances within cells.                                                                                         |
| M7     | 8    | 0.013638845        | GO:0032970 | BP            | regulation of actin filament-based process                   | Any process that modulates the frequency, rate or extent of any cellular process that depends upon or alters the actin cytoskeleton.                                                                                    |
| M7     | 9    | 0.017710713        | GO:0008064 | BP            | regulation of actin polymerization or depolymerization       | Any process that modulates the frequency, rate or extent of the assembly or disassembly of actin filaments by the addition or removal of actin monomers from a filament.                                                |
| M7     | 10   | 0.017710713        | GO:0030832 | BP            | regulation of actin filament length                          | Any process that controls the length of actin filaments in a cell.                                                                                                                                                      |
| M8     | 1    | 0.001031546        | GO:0005504 | MF            | fatty acid binding                                           | Interacting selectively and non-covalently with fatty acids, aliphatic monocarboxylic acids liberated from naturally occurring fats and oils by hydrolysis.                                                             |



## SUPPLEMENTARY DATA

|    |   |             |            |    |                                       |                                                                                                                                                                                                                                                                                                                                                                                                                                                                                                                                                            |
|----|---|-------------|------------|----|---------------------------------------|------------------------------------------------------------------------------------------------------------------------------------------------------------------------------------------------------------------------------------------------------------------------------------------------------------------------------------------------------------------------------------------------------------------------------------------------------------------------------------------------------------------------------------------------------------|
| M8 | 2 | 0.00972337  | GO:0007422 | BP | peripheral nervous system development | The process whose specific outcome is the progression of the peripheral nervous system over time, from its formation to the mature structure. The peripheral nervous system is one of the two major divisions of the nervous system. Nerves in the PNS connect the central nervous system (CNS) with sensory organs, other organs, muscles, blood vessels and glands.                                                                                                                                                                                      |
| M8 | 3 | 0.014301096 | GO:0044242 | BP | cellular lipid catabolic process      | The chemical reactions and pathways resulting in the breakdown of lipids, as carried out by individual cells.                                                                                                                                                                                                                                                                                                                                                                                                                                              |
| M8 | 4 | 0.014301096 | GO:0031406 | MF | carboxylic acid binding               | Interacting selectively and non-covalently with a carboxylic acid, any organic acid containing one or more carboxyl (COOH) groups or anions (COO <sup>-</sup> ).                                                                                                                                                                                                                                                                                                                                                                                           |
| M8 | 5 | 0.025667733 | GO:0015293 | MF | symporter activity                    | Enables the active transport of a solute across a membrane by a mechanism whereby two or more species are transported together in the same direction in a tightly coupled process not directly linked to a form of energy other than chemiosmotic energy.                                                                                                                                                                                                                                                                                                  |
| M8 | 6 | 0.025667733 | GO:0043177 | MF | organic acid binding                  | Interacting selectively and non-covalently with an organic acid, any acidic compound containing carbon in covalent linkage.                                                                                                                                                                                                                                                                                                                                                                                                                                |
| M8 | 7 | 0.032361046 | GO:1901888 | BP | regulation of cell junction assembly  | NA                                                                                                                                                                                                                                                                                                                                                                                                                                                                                                                                                         |
| M8 | 8 | 0.03307393  | GO:0001963 | BP | synaptic transmission, dopaminergic   | The vesicular release of dopamine. from a presynapse, across a chemical synapse, the subsequent activation of dopamine receptors at the postsynapse of a target cell (neuron, muscle, or secretory cell) and the effects of this activation on the postsynaptic membrane potential and ionic composition of the postsynaptic cytosol. This process encompasses both spontaneous and evoked release of neurotransmitter and all parts of synaptic vesicle exocytosis. Evoked transmission starts with the arrival of an action potential at the presynapse. |
| M8 | 9 | 0.03307393  | GO:0006013 | BP | mannose metabolic process             | The chemical reactions and pathways involving mannose, the aldohexose manno-hexose, the C-2 epimer of glucose. The D-(+)-form is widely distributed in mannans and hemicelluloses and is of major importance in the core oligosaccharide of N-linked oligosaccharides of glycoproteins.                                                                                                                                                                                                                                                                    |



## SUPPLEMENTARY DATA

|    |    |             |            |    |                                        |                                                                                                                                                                                                                                                                                                                                                                                                                                                                                                                                                                                                                                                                                                                                                       |
|----|----|-------------|------------|----|----------------------------------------|-------------------------------------------------------------------------------------------------------------------------------------------------------------------------------------------------------------------------------------------------------------------------------------------------------------------------------------------------------------------------------------------------------------------------------------------------------------------------------------------------------------------------------------------------------------------------------------------------------------------------------------------------------------------------------------------------------------------------------------------------------|
| M8 | 10 | 0.03307393  | GO:0006857 | BP | oligopeptide transport                 | The directed movement of oligopeptides into, out of or within a cell, or between cells, by means of some agent such as a transporter or pore. Oligopeptides are molecules that contain a small number (2 to 20) of amino-acid residues connected by peptide linkages.                                                                                                                                                                                                                                                                                                                                                                                                                                                                                 |
| M9 | 1  | 0.000274847 | GO:0019904 | MF | protein domain specific binding        | Interacting selectively and non-covalently with a specific domain of a protein.                                                                                                                                                                                                                                                                                                                                                                                                                                                                                                                                                                                                                                                                       |
| M9 | 2  | 0.000281676 | GO:0045202 | CC | synapse                                | The junction between an axon of one neuron and a dendrite of another neuron, a muscle fiber or a glial cell. As the axon approaches the synapse it enlarges into a specialized structure, the presynaptic terminal bouton, which contains mitochondria and synaptic vesicles. At the tip of the terminal bouton is the presynaptic membrane; facing it, and separated from it by a minute cleft (the synaptic cleft) is a specialized area of membrane on the receiving cell, known as the postsynaptic membrane. In response to the arrival of nerve impulses, the presynaptic terminal bouton secretes molecules of neurotransmitters into the synaptic cleft. These diffuse across the cleft and transmit the signal to the postsynaptic membrane. |
| M9 | 3  | 0.000368293 | GO:0030054 | CC | cell junction                          | A cellular component that forms a specialized region of connection between two or more cells, or between a cell and the extracellular matrix, or between two membrane-bound components of a cell, such as flagella.                                                                                                                                                                                                                                                                                                                                                                                                                                                                                                                                   |
| M9 | 4  | 0.00050049  | GO:0006996 | BP | organelle organization                 | A process that is carried out at the cellular level which results in the assembly, arrangement of constituent parts, or disassembly of an organelle within a cell. An organelle is an organized structure of distinctive morphology and function. Includes the nucleus, mitochondria, plastids, vacuoles, vesicles, ribosomes and the cytoskeleton. Excludes the plasma membrane.                                                                                                                                                                                                                                                                                                                                                                     |
| M9 | 5  | 0.000548468 | GO:0006301 | BP | postreplication repair                 | The conversion of DNA-damage induced single-stranded gaps into large molecular weight DNA after replication. Includes pathways that remove replication-blocking lesions in conjunction with DNA replication.                                                                                                                                                                                                                                                                                                                                                                                                                                                                                                                                          |
| M9 | 6  | 0.001491373 | GO:0032984 | BP | protein-containing complex disassembly | The disaggregation of a protein-containing macromolecular complex into its constituent components.                                                                                                                                                                                                                                                                                                                                                                                                                                                                                                                                                                                                                                                    |

## SUPPLEMENTARY DATA

|     |    |             |            |    |                           |                                                                                                                                                                                                                                                                                                                                                                                                                                                                                                                                                                                                             |
|-----|----|-------------|------------|----|---------------------------|-------------------------------------------------------------------------------------------------------------------------------------------------------------------------------------------------------------------------------------------------------------------------------------------------------------------------------------------------------------------------------------------------------------------------------------------------------------------------------------------------------------------------------------------------------------------------------------------------------------|
| M9  | 7  | 0.001733952 | GO:0023052 | BP | signaling                 | The entirety of a process in which information is transmitted within a biological system. This process begins with an active signal and ends when a cellular response has been triggered.                                                                                                                                                                                                                                                                                                                                                                                                                   |
| M9  | 8  | 0.002217193 | GO:0007010 | BP | cytoskeleton organization | A process that is carried out at the cellular level which results in the assembly, arrangement of constituent parts, or disassembly of cytoskeletal structures.                                                                                                                                                                                                                                                                                                                                                                                                                                             |
| M9  | 9  | 0.002335705 | GO:0006281 | BP | DNA repair                | The process of restoring DNA after damage. Genomes are subject to damage by chemical and physical agents in the environment (e.g. UV and ionizing radiations, chemical mutagens, fungal and bacterial toxins, etc.) and by free radicals or alkylating agents endogenously generated in metabolism. DNA is also damaged because of errors during its replication. A variety of different DNA repair pathways have been reported that include direct reversal, base excision repair, nucleotide excision repair, photoreactivation, bypass, double-strand break repair pathway, and mismatch repair pathway. |
| M9  | 10 | 0.002764995 | GO:0014069 | CC | postsynaptic density      | An electron dense network of proteins within and adjacent to the postsynaptic membrane of an asymmetric, neuron-neuron synapse. Its major components include neurotransmitter receptors and the proteins that spatially and functionally organize them such as anchoring and scaffolding molecules, signaling enzymes and cytoskeletal components.                                                                                                                                                                                                                                                          |
| M10 | 1  | 0.0000316   | GO:0019905 | MF | syntaxin binding          | Interacting selectively and non-covalently with a syntaxin, a SNAP receptor involved in the docking of synaptic vesicles at the presynaptic zone of a synapse.                                                                                                                                                                                                                                                                                                                                                                                                                                              |
| M10 | 2  | 0.000139475 | GO:0000149 | MF | SNARE binding             | Interacting selectively and non-covalently with a SNARE (soluble N-ethylmaleimide-sensitive factor attached protein receptor) protein.                                                                                                                                                                                                                                                                                                                                                                                                                                                                      |
| M10 | 3  | 0.000560425 | GO:0008021 | CC | synaptic vesicle          | A secretory organelle, typically 50 nm in diameter, of presynaptic nerve terminals; accumulates in high concentrations of neurotransmitters and secretes these into the synaptic cleft by fusion with the 'active zone' of the presynaptic plasma membrane.                                                                                                                                                                                                                                                                                                                                                 |

## SUPPLEMENTARY DATA

|     |    |             |            |    |                                                         |                                                                                                                                                                                                                                                   |
|-----|----|-------------|------------|----|---------------------------------------------------------|---------------------------------------------------------------------------------------------------------------------------------------------------------------------------------------------------------------------------------------------------|
| M10 | 4  | 0.000662186 | GO:0070382 | CC | exocytic vesicle                                        | A transport vesicle that mediates transport from an intracellular compartment to the plasma membrane, and fuses with the plasma membrane to release various cargo molecules, such as proteins or hormones, by exocytosis.                         |
| M10 | 5  | 0.001161138 | GO:0017075 | MF | syntaxin-1 binding                                      | Interacting selectively and non-covalently with the SNAP receptor syntaxin-1.                                                                                                                                                                     |
| M10 | 6  | 0.002376727 | GO:0030133 | CC | transport vesicle                                       | Any of the vesicles of the constitutive secretory pathway, which carry cargo from the endoplasmic reticulum to the Golgi, between Golgi cisternae, from the Golgi to the ER (retrograde transport) or to destinations within or outside the cell. |
| M10 | 7  | 0.003408936 | GO:0071156 | BP | regulation of cell cycle arrest                         | Any process that modulates the rate, frequency, or extent of cell cycle arrest, the process in which the cell cycle is halted during one of the normal phases.                                                                                    |
| M10 | 8  | 0.003408936 | GO:0070032 | CC | synaptobrevin 2-SNAP-25-syntaxin-1a-complexin I complex | A SNARE complex that contains synaptobrevin 2 (VAMP2), SNAP-25, syntaxin 1a, and complexin I (or orthologs thereof).                                                                                                                              |
| M10 | 9  | 0.003408936 | GO:0004843 | MF | thiol-dependent ubiquitin-specific protease activity    | Catalysis of the thiol-dependent hydrolysis of a peptide bond formed by the C-terminal glycine of ubiquitin and another protein.                                                                                                                  |
| M10 | 10 | 0.003408936 | GO:0036459 | MF | thiol-dependent ubiquitinyl hydrolase activity          | Catalysis of the thiol-dependent hydrolysis of an ester, thioester, amide, peptide or isopeptide bond formed by the C-terminal glycine of ubiquitin.                                                                                              |
| M11 | 1  | 0.01084545  | GO:0035094 | BP | response to nicotine                                    | Any process that results in a change in state or activity of a cell or an organism (in terms of movement, secretion, enzyme production, gene expression, etc.) as a result of a nicotine stimulus.                                                |
| M11 | 2  | 0.01084545  | GO:0072686 | CC | mitotic spindle                                         | A spindle that forms as part of mitosis. Mitotic and meiotic spindles contain distinctive complements of proteins associated with microtubules.                                                                                                   |
| M11 | 3  | 0.01084545  | GO:0005522 | MF | profilin binding                                        | Interacting selectively and non-covalently with profilin, an actin-binding protein that forms a complex with G-actin and prevents it from polymerizing to form F-actin.                                                                           |
| M11 | 4  | 0.014277445 | GO:0030055 | CC | cell-substrate junction                                 | A cell junction that forms a connection between a cell and the extracellular matrix.                                                                                                                                                              |

## SUPPLEMENTARY DATA

|     |    |             |            |    |                                              |                                                                                                                                                                                                                                                                                                                                        |
|-----|----|-------------|------------|----|----------------------------------------------|----------------------------------------------------------------------------------------------------------------------------------------------------------------------------------------------------------------------------------------------------------------------------------------------------------------------------------------|
| M11 | 5  | 0.020846687 | GO:0042475 | BP | odontogenesis of dentin-containing tooth     | The process whose specific outcome is the progression of a dentin-containing tooth over time, from its formation to the mature structure. A dentin-containing tooth is a hard, bony organ borne on the jaw or other bone of a vertebrate, and is composed mainly of dentin, a dense calcified substance, covered by a layer of enamel. |
| M11 | 6  | 0.020846687 | GO:0051926 | BP | negative regulation of calcium ion transport | Any process that stops, prevents, or reduces the frequency, rate or extent of the directed movement of calcium ions into, out of or within a cell, or between cells, by means of some agent such as a transporter or pore.                                                                                                             |
| M11 | 7  | 0.020846687 | GO:0098974 | BP | postsynaptic actin cytoskeleton organization | A process that is carried out at the cellular level which results in the assembly, arrangement of constituent parts, or disassembly of cytoskeletal structures comprising actin filaments and their associated proteins in the postsynaptic actin cytoskeleton.                                                                        |
| M11 | 8  | 0.047363653 | GO:0038093 | BP | Fc receptor signaling pathway                | A series of molecular signals initiated by the binding of the Fc portion of an immunoglobulin to an Fc receptor on the surface of a signal-receiving cell, and ending with regulation of a downstream cellular process, e.g. transcription. The Fc portion of an immunoglobulin is its C-terminal constant region.                     |
| M11 | 9  | 0.048160823 | GO:1903350 | BP | response to dopamine                         | NA                                                                                                                                                                                                                                                                                                                                     |
| M11 | 10 | 0.048160823 | GO:1903351 | BP | cellular response to dopamine                | NA                                                                                                                                                                                                                                                                                                                                     |

## SUPPLEMENTARY DATA

**Supplementary Table 5.** An area under the ROC curve (AUC) for 18 proteins included in the M10 module.

| Gene name            | single | t-tau | p-tau <sub>181</sub> |
|----------------------|--------|-------|----------------------|
| t-tau                | 0.638  |       |                      |
| p-tau <sub>181</sub> | 0.813  |       |                      |
| VPS29                | 0.675  | 0.5   | 0.813                |
| USP7                 | 0.65   | 0.5   | 0.813                |
| RNF112               | 0.613  | 0.5   | 0.813                |
| PRRT2                | 0.837  | 0.837 | 0.837                |
| NAPA                 | 0.625  | 0.5   | 0.813                |
| TUBB4A               | 0.675  | 0.5   | 0.813                |
| RAB10                | 0.55   | 0.5   | 0.813                |
| ATP6V1H              | 0.638  | 0.5   | 0.813                |
| UCHL1                | 0.625  | 0.5   | 0.813                |
| PLXNA4               | 0.763  | 0.5   | 0.938                |
| MIF                  | 0.7    | 0.5   | 0.813                |
| CKB                  | 0.738  | 0.5   | 0.813                |
| RAB4A                | 0.65   | 0.5   | 0.813                |
| CS                   | 0.662  | 0.5   | 0.813                |
| SNAP25               | 0.8    | 0.8   | 0.963                |
| EFR3A                | 0.563  | 0.5   | 0.813                |
| VAMP2                | 0.738  | 0.5   | 0.813                |
| PCBD1                | 0.563  | 0.500 | 0.813                |

**Supplementary Table 6.** An area under the ROC curve (AUC) for 32 proteins included in the M11 module.

| Gene name            | single | t-tau | p-tau <sub>181</sub> |
|----------------------|--------|-------|----------------------|
| t-tau                | 0.638  |       |                      |
| p-tau <sub>181</sub> | 0.813  |       |                      |
| PFKP                 | 0.863  | 0.863 | 0.863                |
| CSNK2A2              | 0.837  | 0.837 | 0.925                |
| MAPK1                | 0.825  | 0.825 | 0.813                |
| USP5                 | 0.8    | 0.8   | 0.925                |
| GNAO1                | 0.8    | 0.8   | 0.813                |
| UBA1                 | 0.775  | 0.775 | 0.938                |
| NCEH1                | 0.775  | 0.775 | 0.813                |
| SH3GL2               | 0.763  | 0.763 | 0.813                |
| ITGA6                | 0.763  | 0.5   | 0.813                |
| HSPH1                | 0.713  | 0.5   | 0.813                |

## SUPPLEMENTARY DATA

|          |       |     |       |
|----------|-------|-----|-------|
| ACTG1    | 0.688 | 0.5 | 0.813 |
| MON2     | 0.675 | 0.5 | 0.813 |
| PRPS1    | 0.663 | 0.5 | 0.813 |
| PON2     | 0.65  | 0.5 | 0.813 |
| ATP6V1E1 | 0.638 | 0.5 | 0.813 |
| CLTC     | 0.625 | 0.5 | 0.813 |
| NDUFS1   | 0.625 | 0.5 | 0.813 |
| HAGH     | 0.613 | 0.5 | 0.813 |
| TUBA4A   | 0.6   | 0.5 | 0.813 |
| CADPS    | 0.6   | 0.5 | 0.813 |
| CNTN1    | 0.6   | 0.5 | 0.813 |
| TUBA1A   | 0.588 | 0.5 | 0.813 |
| PSMD2    | 0.575 | 0.5 | 0.813 |
| VAT1L    | 0.563 | 0.5 | 0.813 |
| NCAM1    | 0.562 | 0.5 | 0.813 |
| HBB      | 0.55  | 0.5 | 0.813 |
| PPIA     | 0.538 | 0.5 | 0.813 |
| ATP1A2   | 0.538 | 0.5 | 0.813 |
| DBN1     | 0.538 | 0.5 | 0.813 |
| NCKIPSD  | 0.537 | 0.5 | 0.813 |
| VAMP1    | 0.525 | 0.5 | 0.813 |
| CNTNAP1  | 0.513 | 0.5 | 0.813 |

---
